# Supplementary material for: Transcriptome Changes in Colorectal Cancer Cells upon Treatment with Avicequinone B
Source: PubMed Central journal article supplement (PMC7539315; doi:10.34172/apb.2020.077), 2020-08-09
Supplement: apb-10-638-s001.pdf [file apb-10-638-s001.pdf]

## Supplementary File 1

### Supplementary Methods

#### *Cell culture*

Cells were obtained from the American Type Culture Collection (ATCC, Manassas, VA, USA) and maintained with 5% CO<sub>2</sub> at 37 °C in McCoy's 5A medium (HT-29), Dulbecco's Modified Eagle's medium (A549, PC-3, MDA-MB-231, PCS-201-012 and 3T3-L1) or Eagle's Minimal Essential Medium (MRC-5) (Sigma-Aldrich, St. Louis, MO, USA) supplemented with 10% fetal bovine serum (FBS, Gibco, Sao Paulo, Brazil) and 1.5 g/L sodium bicarbonate (Sigma-Aldrich, St. Louis, MO, USA), plus low serum growth supplement (Invitrogen, Waltham, MA, USA) for PCS-201-012.

#### *Cell Viability assay*

Briefly, cells were seeded at appropriate densities (10.000-15.000 cells/well) in 96-well plates, incubated for 24 h, and treated with various concentrations of avicequinone B (0-50 µM). After 48 h, the cells were incubated with 0.25 mg/mL MTT (Calbiochem, La Jolla, CA, USA). Four hours later, formazan crystals were dissolved in DMSO and the O.D. at 550 nm was measured using a plate reader (Multiskan GO, Thermo Scientific, Rockford, IL, USA). Inhibition of cell proliferation was expressed as percentage of viable cells in treated samples as compared to vehicle-treated cells, and the 50% inhibitory concentration of cell proliferation (IC<sub>50</sub>) was calculated by nonlinear regression.

#### *Bioinformatics*

Initial bioinformatics analysis was performed at Corporación CorpoGen (Bogotá, Colombia). First, sequencing quality was verified with the raw FastQC reads. Data pre-

processing included removing adapter sequences, trimming low quality ends, and filtering low quality reads at phred quality score Q33 using Trimmomatic.<sup>1</sup> Clean high-quality reads were aligned to a human reference genome (GRCh38.p7) with Tophat.<sup>2</sup> The expression level for each transcript was calculated as fragments per kilobase of transcript per million mapped fragments (FPKM) using Cufflinks. Differentially expressed genes (DEGs) were detected with Cuffdiff.<sup>3</sup> Genes were considered differentially expressed using the following threshold:  $\log_2 |(\text{fold change})| \geq 0.5$ ,  $p\text{-value} \leq 0.001$ , and false discovery rate (FDR)  $q\text{-value} \leq 0.05$ . Finally, the data (significantly impacted pathways, biological processes, molecular function, cellular components, etc.) were analyzed using iPathwayGuide online software (Advaita Corporation, Plymouth, MI, USA). The protein-protein interaction network was analyzed using STRING database<sup>4</sup> and visualized using Cytoscape.<sup>5</sup>

#### ***Quantitative real-time PCR (RT-qPCR)***

To validate the RNA-sequencing analysis, six DEGs (three up-regulated and three down-regulated) were selected for RT-qPCR. For each sample, 1.0  $\mu\text{g}$  of RNA was employed for cDNA synthesis using the High Capacity cDNA reverse transcription kit (Applied Biosystems, Vilnius, Lithuania). RT-qPCR analysis was performed with the LightCycler® 96 System (Roche, Mannheim, Germany) using FastStart Essential DNA Green Master (Roche, Mannheim, Germany) and specific primers (**Supplementary Table 1**, Eurofins Genomics, Huntsville, USA). Gene expression was normalized to glyceraldehyde-3-phosphate dehydrogenase (GAPDH) or hypoxanthine phosphoribosyltransferase 1 (HPRT1) as endogenous housekeeping genes. Duplicate cycle threshold (CT) values were analyzed by the comparative CT ( $\Delta\Delta\text{CT}$ ) method.

#### ***Ames Mutagenicity Test***

Mutagenicity of avicequinone B was assessed by using the commercial Muta-ChromoPlate™ Ames test kit (EBPI Inc., Ontario, Canada), which follows Ames's test principle and uses *Salmonella typhimurium* (TA100). Avicequinone B was dissolved in DMSO, diluted in growth media to obtain the desired concentration (8.20  $\mu\text{M}$ ), mixed with *S. typhimurium* inoculum, and incubated in both presence and absence of S9 fraction, for 3 days at 37 °C in sterile air-tight plastic bag. After incubation, microplates were scored visually: yellow, partially yellow or turbid wells were scored as positives and all purple wells were scored negative. Sodium azide and 2-aminoanthracene were employed as positive control and DMSO was employed as negative control.

#### ***Micronucleus assay***

3T3-L1 fibroblasts (75.000 cells/well) were seeded and incubated for 24 h, and treated with vehicle (control), avicequinone B (10.7  $\mu\text{M}$ ) or mitomycin C (MMC, 0.5  $\mu\text{M}$ ) for 30 h. Subsequently, cells were treated with cytochalasin B (4.5  $\mu\text{g}/\text{mL}$ ) for 18 h and then detached with trypsin, washed and re-suspended with PBS, and finally fixed with ethanol:acetic acid (3:1). Smears were prepared for each sample (20  $\mu\text{L}$ ), air dried, stained with Wright's solution (Merck, Darmstadt, Germany), and labeled with a random number to avoid the identification of the treatment group during analysis. Coded slides were analyzed by two independent investigators using a Zeiss Axio Lab.A1 microscope (Carl Zeiss, Oberkochen, Germany).

#### ***Comet Assay***

The comet assay was performed in neutral conditions as described by Trevigen (Trevigen, Gaithersburg, USA) with some modifications. Briefly, 3T3-L1 cells (250.000 cells/well) were treated with vehicle (control) or avicequinone B (10.7  $\mu\text{M}$ ) for 48 h. Hydrogen peroxide (150  $\mu\text{M}$ ) was employed as positive control. Cells were detached using trypsin, centrifuged, and suspended in cold PBS. The cellular suspension

(10  $\mu$ L) was mixed with low-melting point agarose (Trevigen) and spread on CometSlides<sup>TM</sup> (Trevigen). After lysis, slides were equilibrated and electrophoresis was performed at 300 mA for 1 h. Finally, DNA was precipitated, and the slides were air dried, fixed in ethanol, and stained with SYBR<sup>®</sup> Safe DNA stain (Invitrogen, Carlsbad, USA). Cells were then visualized using a fluorescent microscope (Axio Lab.A1, Carl Zeiss, Oberkochen, Germany). Representative pictures were recorded at 10X magnification with a Zeiss AxioCAM digital camera (ICc5).

To assess the extent and distribution of DNA damage a qualitative analysis was performed by three blinded scorers that examined 100-1000 randomly selected and non-overlapping comets per well that were classified visually according to tail size ranging from undamaged (class 0) to maximum DNA damage (class 4), as shown in **Figure S1C**.

## Supplementary Tables

**Table S1.** Sequences of Primers used for Real-time qPCR analysis.

| Gene Symbol | Gene ID | Official Name                                 | Primer sequences <sup>a</sup>                              | T <sub>m</sub> <sup>b</sup> | Amplicon Size (pb) |
|-------------|---------|-----------------------------------------------|------------------------------------------------------------|-----------------------------|--------------------|
| AKAP12      | 9590    | A-kinase anchoring protein 12                 | F: GAGATGGCTACTAAGTCAGCGG<br>R: CAGTGGGTTGTGTTAGCTCTTC     | 60.3 °C<br>59.2 °C          | 124                |
| CYP1A1      | 1543    | Cytochrome P450 family 1 subfamily A member 1 | F: TCCGGGACATCACAGACAGC<br>R: ACCCTGGGGTTCATCACCAA         | 61.9 °C<br>61.1 °C          | 184                |
| EPSTI1      | 94240   | Epithelial stromal interaction 1              | F: ACCCGCAATAGAGTGGTGAAC<br>R: GCTATCAAGGTGTATGCACTTGT     | 60.3 °C<br>59.1 °C          | 206                |
| GAPDH       | 2597    | Glyceraldehyde-3-phosphate dehydrogenase      | F: TCGACAGTCAGCCGCATCTTCTTT<br>R: AACTCTACTTTGCAGAACCCTCAC | 64.6 °C<br>64.6 °C          | 94                 |
| HPRT        | 3251    | Hypoxanthine phosphoribosyltransferase 1      | F: ACCAGTCAACAGGGGACATAA<br>R: CTCGTGGGGTCCCTTTCACC        | 58.7 °C<br>61.2 °C          | 190                |
| IFI44L      | 10964   | Interferon induced protein 44 like            | F: ACAGAGCCAAATGATTCCCTATG<br>R: TCGATAAACGACACACCAGTTG    | 58.6 °C<br>58.9 °C          | 124                |
| IFITM1      | 8519    | Interferon induced transmembrane protein 1    | F: ACTCAACACTTCCTTCCCAA<br>R: CTCCTGTCCCTAGACTTCACG        | 59.2 °C<br>59.8 °C          | 231                |
| SPRR1B      | 6699    | Small proline rich protein 1B                 | F: TATTCCTCTTTCACACCAG<br>R: TCCTTGGTTTTGGGGATG            | 53.8 °C<br>54.3 °C          | 155                |

<sup>a</sup> F: Forward (5'→3'); R: Reverse (5'→3'). <sup>b</sup> T<sub>m</sub>: Melting temperature.

**Table S2.** Summary of RNA-seq data including library construction, sequencing and mapping results.

| Treatment      | Sample | Library Size (Average) | Raw Reads  | Clean Reads | Mapped Reads | Mapping Rate | GC% |
|----------------|--------|------------------------|------------|-------------|--------------|--------------|-----|
| Vehicle (DMSO) | 1      | 588                    | 12.526.531 | 11.931.359  | 10.537.310   | 88.3%        | 51  |
|                | 2      | 696                    | 14.816.823 | 14.044.340  | 12.334.470   | 87.8%        | 51  |
|                | 3      | 680                    | 14.596.730 | 13.858.108  | 12.218.747   | 88.2%        | 51  |
| Avicequinone B | 4      | 613                    | 11.080.591 | 10.536.861  | 9.320.257    | 88.46%       | 50  |
|                | 5      | 555                    | 11.732.386 | 11.119.540  | 9.807.826    | 88.20%       | 50  |
|                | 6      | 461                    | 6.825.309  | 6.465.727   | 5.530.893    | 85.54%       | 50  |

**Table S3.** Differentially expressed genes in HT-29 cells treated with avicequinone B in comparison with control (DMSO-treated) counterparts.

| Gene     | Locus                            | Value 1 (Control) | Value 2 (Avicequinone B) | LogFC <sup>a</sup> | p value  | q value    |
|----------|----------------------------------|-------------------|--------------------------|--------------------|----------|------------|
| IFITM1   | NC_000011.10:313990-315272       | 42.5409           | 2.42756                  | -4.13127           | 5.00E-05 | 0.00377623 |
| LAPTM5   | NC_000001.11:30732467-30757840   | 2.00973           | 0.201078                 | -3.32118           | 0.0001   | 0.00676519 |
| IFI44L   | NC_000001.11:78620381-78646145   | 7.62704           | 0.770775                 | -3.30674           | 5.00E-05 | 0.00377623 |
| RSAD2    | NC_000002.12:6828553-6898239     | 3.28666           | 0.460121                 | -2.83654           | 5.00E-05 | 0.00377623 |
| EPST11   | NC_000013.11:42886387-42992271   | 2.74703           | 0.431894                 | -2.66912           | 5.00E-05 | 0.00377623 |
| TMEM40   | NC_000003.12:12733529-12769457   | 1.25091           | 0.201787                 | -2.63207           | 5.00E-05 | 0.00377623 |
| TNNC1    | NC_000003.12:52451090-52454041   | 14.2123           | 2.47664                  | -2.52069           | 5.00E-05 | 0.00377623 |
| GPRC5B   | NC_000016.10:19858970-19886045   | 1.2985            | 0.232402                 | -2.48215           | 5.00E-05 | 0.00377623 |
| CMPK2    | NC_000002.12:6828553-6898239     | 8.46783           | 1.59231                  | -2.41087           | 5.00E-05 | 0.00377623 |
| HOPX     | NC_000004.12:56647987-56681866   | 2.20683           | 0.416391                 | -2.40596           | 5.00E-05 | 0.00377623 |
| OASL     | NC_000012.12:121018881-121039242 | 55.8964           | 10.7213                  | -2.38227           | 5.00E-05 | 0.00377623 |
| CDX1     | NC_000005.10:150166780-150184558 | 3.06173           | 0.616582                 | -2.31198           | 5.00E-05 | 0.00377623 |
| XAF1     | NC_000017.11:6755410-6775647     | 3.6127            | 0.732204                 | -2.30276           | 5.00E-05 | 0.00377623 |
| HEPACAM2 | NC_000007.14:93188585-93232297   | 4.04772           | 0.821486                 | -2.3008            | 5.00E-05 | 0.00377623 |
| SGCA     | NC_000017.11:50157836-50175932   | 1.10714           | 0.227868                 | -2.28057           | 0.00015  | 0.00930899 |
| CIDEC    | NC_000003.12:9866709-9880254     | 3.47535           | 0.716569                 | -2.27798           | 5.00E-05 | 0.00377623 |
| PPP1R14D | NC_000015.10:40815444-40828793   | 13.2244           | 2.75664                  | -2.26222           | 5.00E-05 | 0.00377623 |
| PIGR     | NC_000001.11:206928521-206946466 | 7.01245           | 1.47269                  | -2.25146           | 5.00E-05 | 0.00377623 |
| IFIT1    | NC_000010.11:89392545-89406487   | 18.5847           | 3.94525                  | -2.23593           | 5.00E-05 | 0.00377623 |
| SEPT4    | NC_000017.11:58519836-58692055   | 1.53396           | 0.331877                 | -2.20854           | 5.00E-05 | 0.00377623 |
| MX2      | NC_000021.9:41304228-41408943    | 6.10635           | 1.32814                  | -2.2009            | 5.00E-05 | 0.00377623 |
| CASP1    | NC_000011.10:105025507-105035591 | 1.67499           | 0.384346                 | -2.12367           | 0.00085  | 0.0351483  |
| LCE1E    | NC_000001.11:152786276-152788426 | 2.82979           | 0.65109                  | -2.11977           | 0.00055  | 0.0257143  |
| OAS2     | NC_000012.12:112978394-          | 29.0267           | 6.94227                  | -2.0639            | 5.00E-05 | 0.00377623 |

|          | 113011723                        |         |          |          |          |            |
|----------|----------------------------------|---------|----------|----------|----------|------------|
| IFI44    | NC_000001.11:78648553-78664078   | 52.6196 | 12.7625  | -2.0437  | 5.00E-05 | 0.00377623 |
| AGXT     | NC_000002.12:240868744-240879119 | 1.67463 | 0.410501 | -2.02839 | 0.0011   | 0.0422045  |
| CD200    | NC_000003.12:112332223-112362812 | 5.58892 | 1.37295  | -2.02529 | 5.00E-05 | 0.00377623 |
| IFITM3   | NC_000011.10:319672-320914       | 250.965 | 62.0231  | -2.01661 | 5.00E-05 | 0.00377623 |
| ISG15    | NC_000001.11:1013466-1014540     | 594.444 | 148.447  | -2.00159 | 5.00E-05 | 0.00377623 |
| REG4     | NC_000001.11:119794017-119811580 | 70.8985 | 17.7209  | -2.0003  | 5.00E-05 | 0.00377623 |
| RNASE1   | NC_000014.9:20725951-20810034    | 3.88919 | 0.980171 | -1.98837 | 5.00E-05 | 0.00377623 |
| MAPK11   | NC_000022.11:50263712-50270393   | 1.94488 | 0.492248 | -1.98223 | 5.00E-05 | 0.00377623 |
| IFI6     | NC_000001.11:27666060-27672213   | 194.867 | 49.5202  | -1.9764  | 5.00E-05 | 0.00377623 |
| PLLP     | NC_000016.10:57256096-57284672   | 1.80507 | 0.459813 | -1.97294 | 0.001    | 0.039516   |
| NOTUM    | NC_000017.11:81952506-81961181   | 1.7484  | 0.446327 | -1.96986 | 0.00015  | 0.00930899 |
| MX1      | NC_000021.9:41420328-41459214    | 33.7418 | 8.68634  | -1.95772 | 5.00E-05 | 0.00377623 |
| IFIT2    | NC_000010.11:89293472-89316145   | 14.1052 | 3.63721  | -1.95532 | 5.00E-05 | 0.00377623 |
| DDX60    | NC_000004.12:168216290-168318807 | 9.93407 | 2.586    | -1.94166 | 5.00E-05 | 0.00377623 |
| PGF      | NC_000014.9:74941829-74955764    | 1.53897 | 0.405425 | -1.92446 | 0.00035  | 0.018209   |
| APOE     | NC_000019.10:44905748-44909395   | 6.08789 | 1.6106   | -1.91834 | 5.00E-05 | 0.00377623 |
| NTF4     | NC_000019.10:49054273-49065076   | 3.65749 | 0.979458 | -1.9008  | 0.0001   | 0.00676519 |
| PAX4     | NC_000007.14:127610291-127618192 | 1.33869 | 0.364996 | -1.87486 | 0.00125  | 0.0466054  |
| PTPRO    | NC_000012.12:15322256-15598331   | 7.26995 | 2.0539   | -1.82358 | 5.00E-05 | 0.00377623 |
| LCK      | NC_000001.11:32251238-32286167   | 1.17102 | 0.337414 | -1.79517 | 0.0003   | 0.0161565  |
| HERC6    | NC_000004.12:88378564-88506170   | 13.2967 | 3.85989  | -1.78443 | 5.00E-05 | 0.00377623 |
| IFIT3    | NC_000010.11:89327818-89344944   | 32.7464 | 9.56394  | -1.77566 | 5.00E-05 | 0.00377623 |
| GUCA2A   | NC_000001.11:42162690-42164724   | 5.79368 | 1.69985  | -1.76907 | 0.00115  | 0.0436419  |
| ANXA13   | NC_000008.11:123680793-123766246 | 66.1225 | 19.4665  | -1.76415 | 5.00E-05 | 0.00377623 |
| NEUROG3  | NC_000010.11:69571439-69577099   | 3.04965 | 0.919591 | -1.72958 | 0.0004   | 0.020233   |
| GJB6     | NC_000013.11:20221961-20232395   | 1.30194 | 0.401172 | -1.69836 | 0.00025  | 0.0139341  |
| UBE2L6   | NC_000011.10:57551654-57568330   | 17.2816 | 5.33834  | -1.69477 | 5.00E-05 | 0.00377623 |
| FFAR2    | NC_000019.10:35447964-35451767   | 1.59041 | 0.495312 | -1.68299 | 0.0005   | 0.023902   |
| GBP1     | NC_000001.11:89034665-89102691   | 1.9541  | 0.616409 | -1.66455 | 0.00035  | 0.018209   |
| SERPINE1 | NC_000007.14:101127086-101139266 | 2.62158 | 0.830796 | -1.65787 | 5.00E-05 | 0.00377623 |
| OAS1     | NC_000012.12:112906776-112932190 | 92.4562 | 29.3328  | -1.65625 | 5.00E-05 | 0.00377623 |
| KLK12    | NC_000019.10:51028953-51035651   | 6.1343  | 1.95372  | -1.65068 | 0.0001   | 0.00676519 |
| IFI27    | NC_000014.9:94110732-94116699    | 651.455 | 207.715  | -1.64906 | 5.00E-05 | 0.00377623 |
| NEURL1   | NC_000010.11:103479602-103592552 | 3.07106 | 0.979787 | -1.64819 | 5.00E-05 | 0.00377623 |
| RARRES3  | NC_000011.10:63536800-63546458   | 157.788 | 50.5314  | -1.64273 | 5.00E-05 | 0.00377623 |
| GPA33    | NC_000001.11:167051126-167091553 | 2.43622 | 0.789404 | -1.62581 | 5.00E-05 | 0.00377623 |

|          |                                  |         |          |          |          |            |
|----------|----------------------------------|---------|----------|----------|----------|------------|
| HYAL1    | NC_000003.12:50299888-50312951   | 4.28803 | 1.41282  | -1.60174 | 0.00015  | 0.00930899 |
| NEURL3   | NC_000002.12:96497642-96508157   | 2.99216 | 0.990892 | -1.59439 | 5.00E-05 | 0.00377623 |
| RHOV     | NC_000015.10:40872213-40874289   | 6.57375 | 2.17994  | -1.59243 | 5.00E-05 | 0.00377623 |
| RARRES2  | NC_000007.14:150338317-150341685 | 18.8919 | 6.34154  | -1.57486 | 5.00E-05 | 0.00377623 |
| COCH     | NC_000014.9:30874495-30890618    | 2.93872 | 0.990655 | -1.56874 | 5.00E-05 | 0.00377623 |
| CLDN2    | NC_000023.11:106900062-106930861 | 62.9028 | 21.3092  | -1.56165 | 5.00E-05 | 0.00377623 |
| FAM83C   | NC_000020.11:35285250-35292422   | 1.13674 | 0.388841 | -1.54766 | 0.00055  | 0.0257143  |
| CLDN9    | NC_000016.10:3012455-3014505     | 6.01097 | 2.05831  | -1.54614 | 5.00E-05 | 0.00377623 |
| ETNK2    | NC_000001.11:204131060-204152182 | 1.2446  | 0.43096  | -1.53005 | 0.0004   | 0.020233   |
| GAMT     | NC_000019.10:1397025-1401570     | 6.03035 | 2.0887   | -1.52964 | 5.00E-05 | 0.00377623 |
| WWTR1    | NC_000003.12:149517234-149724783 | 1.18082 | 0.41277  | -1.51639 | 5.00E-05 | 0.00377623 |
| MAFB     | NC_000020.11:40685847-40689240   | 1.64182 | 0.576004 | -1.51114 | 0.0001   | 0.00676519 |
| CARNS1   | NC_000011.10:67415677-67425607   | 2.10177 | 0.74173  | -1.50264 | 5.00E-05 | 0.00377623 |
| AIF1L    | NC_000009.12:131096475-131123152 | 2.78618 | 0.99164  | -1.4904  | 5.00E-05 | 0.00377623 |
| PSMB9    | NC_000006.12:32854160-32859851   | 10.7217 | 3.8259   | -1.48666 | 5.00E-05 | 0.00377623 |
| S100A2   | NC_000001.11:153561107-153565830 | 39.2015 | 14.097   | -1.47552 | 5.00E-05 | 0.00377623 |
| RBP4     | NC_000010.11:93591835-93601744   | 12.4303 | 4.49303  | -1.4681  | 5.00E-05 | 0.00377623 |
| LGALS2   | NC_000022.11:37570245-37580017   | 47.9498 | 17.3803  | -1.46407 | 5.00E-05 | 0.00377623 |
| PALM3    | NC_000019.10:14053366-14062137   | 3.47439 | 1.26756  | -1.4547  | 5.00E-05 | 0.00377623 |
| ADH6     | NC_000004.12:99088856-99301356   | 3.89607 | 1.43769  | -1.43827 | 0.00015  | 0.00930899 |
| LYPD6B   | NC_000002.12:149038466-149215262 | 2.71453 | 1.00336  | -1.43586 | 5.00E-05 | 0.00377623 |
| SLC1A7   | NC_000001.11:53087178-53142632   | 2.82452 | 1.04592  | -1.43324 | 0.0001   | 0.00676519 |
| SPHK1    | NC_000017.11:76382976-76387860   | 2.1454  | 0.796574 | -1.42937 | 0.0003   | 0.0161565  |
| PDZK1IP1 | NC_000001.11:47183588-47190099   | 67.8236 | 25.2021  | -1.42824 | 5.00E-05 | 0.00377623 |
| AQP7     | NC_000009.12:33383134-33410302   | 1.20752 | 0.44907  | -1.42704 | 0.00035  | 0.018209   |
| IL1R1    | NC_000002.12:102069637-102179874 | 1.22748 | 0.460053 | -1.41583 | 0.0002   | 0.0117098  |
| CX3CL1   | NC_000016.10:57372460-57385048   | 2.39113 | 0.904247 | -1.4029  | 5.00E-05 | 0.00377623 |
| USP18    | NC_000022.11:18149958-18177397   | 7.4884  | 2.85643  | -1.39044 | 5.00E-05 | 0.00377623 |
| RAET1L   | NC_000006.12:150018333-150025596 | 5.96602 | 2.2771   | -1.38957 | 5.00E-05 | 0.00377623 |
| TFF3     | NC_000021.9:42311666-42315596    | 25.0933 | 9.58104  | -1.38904 | 5.00E-05 | 0.00377623 |
| CEACAM7  | NC_000019.10:41673306-41688277   | 1.88004 | 0.720893 | -1.3829  | 0.0006   | 0.027416   |
| CFB      | NC_000006.12:31945943-31952084   | 10.9144 | 4.19933  | -1.378   | 5.00E-05 | 0.00377623 |
| FOLR1    | NC_000011.10:72189557-72196323   | 15.7596 | 6.0742   | -1.37547 | 5.00E-05 | 0.00377623 |
| UPK3A    | NC_000022.11:45284986-45295874   | 8.35012 | 3.22356  | -1.37314 | 0.0003   | 0.0161565  |
| BLVRA    | NC_000007.14:43754840-43839020   | 6.18426 | 2.40321  | -1.36363 | 0.00035  | 0.018209   |
| KRT17    | NC_000017.11:41619439-41624630   | 15.4625 | 6.07751  | -1.34722 | 5.00E-05 | 0.00377623 |
| COP2     | NC_000017.11:48026166-48048091   | 4.32374 | 1.71784  | -1.33168 | 0.0004   | 0.020233   |



|            |                                  |         |          |          |          |            |
|------------|----------------------------------|---------|----------|----------|----------|------------|
| PRAP1      | NC_000010.11:133347339-133352683 | 34.2362 | 13.7289  | -1.31831 | 5.00E-05 | 0.00377623 |
| OAS3       | NC_000012.12:112938432-112973251 | 59.775  | 24.0309  | -1.31465 | 5.00E-05 | 0.00377623 |
| TNFAIP8L3  | NC_000015.10:51056595-51105276   | 7.44057 | 2.99874  | -1.31106 | 5.00E-05 | 0.00377623 |
| PLEKHA4    | NC_000019.10:48837091-48868627   | 5.57248 | 2.25644  | -1.30427 | 5.00E-05 | 0.00377623 |
| CD74       | NC_000005.10:150401636-150412936 | 12.0218 | 4.87479  | -1.30224 | 5.00E-05 | 0.00377623 |
| MAP1LC3A   | NC_000020.11:34546822-34560345   | 26.0717 | 10.5958  | -1.299   | 5.00E-05 | 0.00377623 |
| SUSD3      | NC_000009.12:93058687-93085138   | 3.74852 | 1.52781  | -1.29486 | 0.0003   | 0.0161565  |
| N4BP3      | NC_000005.10:178113505-178127034 | 1.20235 | 0.4922   | -1.28854 | 0.0001   | 0.00676519 |
| TSPAN32    | NC_000011.10:2296276-2318201     | 1.97298 | 0.813535 | -1.2781  | 0.00075  | 0.0322677  |
| PARP9      | NC_000003.12:122525589-122575203 | 42.15   | 17.3886  | -1.27739 | 5.00E-05 | 0.00377623 |
| PRODH      | NC_000022.11:18912773-18936553   | 1.88308 | 0.778253 | -1.27478 | 0.0012   | 0.0452256  |
| NES        | NC_000001.11:156668762-156677397 | 1.70873 | 0.70665  | -1.27386 | 0.00015  | 0.00930899 |
| SLPI       | NC_000020.11:45230820-45290352   | 10.3812 | 4.31824  | -1.26546 | 0.0012   | 0.0452256  |
| RASL11A    | NC_000013.11:27270326-27273690   | 40.1973 | 16.7707  | -1.26115 | 5.00E-05 | 0.00377623 |
| SERPINA6   | NC_000014.9:94304247-94323351    | 6.21789 | 2.5944   | -1.26102 | 0.0001   | 0.00676519 |
| C1orf115   | NC_000001.11:220690285-220699157 | 2.02657 | 0.848347 | -1.25632 | 0.0006   | 0.027416   |
| CDX2       | NC_000013.11:27960917-27969368   | 2.35487 | 1.00252  | -1.23201 | 0.0004   | 0.020233   |
| APOL3      | NC_000022.11:36140322-36166177   | 3.36534 | 1.43891  | -1.22578 | 5.00E-05 | 0.00377623 |
| SECTM1     | NC_000017.11:82321023-82334045   | 4.26709 | 1.83601  | -1.21668 | 0.00045  | 0.0220627  |
| SOWAHA     | NC_000005.10:132813323-132816797 | 2.01462 | 0.875316 | -1.20263 | 0.00025  | 0.0139341  |
| SMPD1      | NC_000011.10:6390300-6394998     | 4.85654 | 2.13595  | -1.18505 | 5.00E-05 | 0.00377623 |
| IFIH1      | NC_000002.12:162267078-162318708 | 13.2086 | 5.83259  | -1.17927 | 5.00E-05 | 0.00377623 |
| UBA7       | NC_000003.12:49805204-49813958   | 4.75    | 2.10834  | -1.17182 | 5.00E-05 | 0.00377623 |
| ST6GALNAC1 | NC_000017.11:76617768-76643838   | 3.28893 | 1.46209  | -1.16959 | 0.00015  | 0.00930899 |
| LINC00261  | NC_000020.11:22560552-22578642   | 9.96174 | 4.43652  | -1.16697 | 5.00E-05 | 0.00377623 |
| DHX58      | NC_000017.11:42101403-42112733   | 9.02519 | 4.02228  | -1.16595 | 5.00E-05 | 0.00377623 |
| KCNH2      | NC_000007.14:150944955-150978314 | 8.38604 | 3.74719  | -1.16218 | 5.00E-05 | 0.00377623 |
| FAM132B    | NC_000002.12:238159007-238168890 | 2.28682 | 1.02864  | -1.1526  | 0.0008   | 0.0338484  |
| SCAMP5     | NC_000015.10:74995534-75021495   | 4.23013 | 1.90644  | -1.14982 | 0.0001   | 0.00676519 |
| DDX58      | NC_000009.12:32455301-32526324   | 10.5294 | 4.7583   | -1.1459  | 5.00E-05 | 0.00377623 |
| SLC5A9     | NC_000001.11:48221112-48248644   | 1.163   | 0.526616 | -1.14303 | 0.00135  | 0.048998   |
| LOXL1      | NC_000015.10:73917467-73952141   | 9.89426 | 4.49238  | -1.13911 | 5.00E-05 | 0.00377623 |
| HES6       | NC_000002.12:238238266-238240124 | 36.1551 | 16.4592  | -1.1353  | 5.00E-05 | 0.00377623 |
| CIB2       | NC_000015.10:78104605-78131976   | 4.29633 | 1.97181  | -1.12358 | 0.0007   | 0.0307735  |
| HES4       | NC_000001.11:998961-1001052      | 13.2588 | 6.0935   | -1.1216  | 5.00E-05 | 0.00377623 |
| SERPINE2   | NC_000002.12:223975047-224039319 | 5.12713 | 2.3618   | -1.11826 | 5.00E-05 | 0.00377623 |
| LY6E       | NC_000008.11:143018484-143022410 | 326.82  | 151.639  | -1.10786 | 5.00E-05 | 0.00377623 |

|         |                                  |         |          |           |          |            |
|---------|----------------------------------|---------|----------|-----------|----------|------------|
| FAM131C | NC_000001.11:16057768-16073632   | 4.00417 | 1.85902  | -1.10696  | 0.0011   | 0.0422045  |
| FOXJ1   | NC_000017.11:76136332-76240368   | 7.35402 | 3.4719   | -1.08281  | 0.00015  | 0.00930899 |
| MATN2   | NC_000008.11:97869020-98036720   | 3.09348 | 1.46201  | -1.08127  | 0.00025  | 0.0139341  |
| SLC7A7  | NC_000014.9:22773221-22819811    | 14.7377 | 6.99155  | -1.07583  | 5.00E-05 | 0.00377623 |
| AQP1    | NC_000007.14:30911799-30925516   | 9.45705 | 4.48919  | -1.07494  | 5.00E-05 | 0.00377623 |
| AGR3    | NC_000007.14:16854710-16881989   | 46.1377 | 21.9478  | -1.07187  | 5.00E-05 | 0.00377623 |
| ULBP2   | NC_000006.12:149941937-149949235 | 10.7436 | 5.13179  | -1.06594  | 5.00E-05 | 0.00377623 |
| BST2    | NC_000019.10:17402938-17405648   | 214.436 | 102.587  | -1.06371  | 5.00E-05 | 0.00377623 |
| CTSV    | NC_000009.12:97029676-97039643   | 5.50947 | 2.63952  | -1.06164  | 5.00E-05 | 0.00377623 |
| VGLL1   | NC_000023.11:136532151-136556807 | 7.4013  | 3.54918  | -1.06029  | 0.00025  | 0.0139341  |
| HLA-DMA | NC_000006.12:32948613-32953122   | 18.1999 | 8.73976  | -1.05826  | 5.00E-05 | 0.00377623 |
| CD6     | NC_000011.10:60971640-61020377   | 1.55958 | 0.756242 | -1.04424  | 0.00135  | 0.048998   |
| TACSTD2 | NC_000001.11:58575422-58577494   | 31.0952 | 15.2185  | -1.03087  | 5.00E-05 | 0.00377623 |
| TMPRSS4 | NC_000011.10:118015771-118125505 | 42.9256 | 21.029   | -1.02946  | 5.00E-05 | 0.00377623 |
| SOD3    | NC_000004.12:24795462-24800845   | 8.92351 | 4.37368  | -1.02876  | 0.00015  | 0.009309   |
| C2orf54 | NC_000002.12:240886047-240896889 | 12.5282 | 6.16881  | -1.02212  | 5.00E-05 | 0.00377623 |
| TUBA4A  | NC_000002.12:219245468-219272188 | 105.916 | 52.2283  | -1.02002  | 5.00E-05 | 0.00377623 |
| FBXO44  | NC_000001.11:11648360-11663327   | 6.17793 | 3.05775  | -1.01465  | 0.00095  | 0.0380109  |
| MDK     | NC_000011.10:46380783-46383837   | 116.157 | 57.8586  | -1.00547  | 5.00E-05 | 0.00377623 |
| HSH2D   | NC_000019.10:16134027-16158575   | 7.62096 | 3.80238  | -1.00307  | 0.00075  | 0.0322677  |
| RAMP1   | NC_000002.12:237858713-237912117 | 9.90607 | 4.95002  | -1.00088  | 0.0006   | 0.027416   |
| ADGRB2  | NC_000001.11:31727104-31764063   | 2.15238 | 1.07688  | -0.99908  | 0.0001   | 0.00676519 |
| TUBB2A  | NC_000006.12:3153665-3157549     | 19.0084 | 9.56792  | -0.990361 | 5.00E-05 | 0.00377623 |
| FLT3LG  | NC_000019.10:49474171-49487038   | 5.88006 | 2.97305  | -0.983887 | 0.0004   | 0.020233   |
| NME4    | NC_000016.10:382240-400754       | 56.7499 | 28.7151  | -0.982807 | 5.00E-05 | 0.00377623 |
| WNK4    | NC_000017.11:42779700-42797066   | 11.1154 | 5.63265  | -0.980673 | 5.00E-05 | 0.00377623 |
| SARDH   | NC_000009.12:133663073-133739958 | 1.88408 | 0.955597 | -0.979385 | 0.0009   | 0.0363522  |
| PLPPR2  | NC_000019.10:11355385-11365698   | 6.07172 | 3.11608  | -0.962372 | 5.00E-05 | 0.00377623 |
| IFI35   | NC_000017.11:43006724-43014459   | 38.3569 | 19.7291  | -0.959157 | 5.00E-05 | 0.00377623 |
| SP110   | NC_000002.12:230165465-230316571 | 16.369  | 8.43213  | -0.956997 | 5.00E-05 | 0.00377623 |
| PDZK1   | NC_000001.11:145607959-145707507 | 8.78657 | 4.53874  | -0.953009 | 0.0003   | 0.0161565  |
| IFIT5   | NC_000010.11:89413855-89421506   | 6.26689 | 3.24151  | -0.951085 | 5.00E-05 | 0.00377623 |
| DPEP1   | NC_000016.10:89613307-89641540   | 34.0581 | 17.6625  | -0.947309 | 5.00E-05 | 0.00377623 |
| IHH     | NC_000002.12:219054419-219060516 | 16.0267 | 8.32306  | -0.945295 | 5.00E-05 | 0.00377623 |
| E2F2    | NC_000001.11:23505695-23531266   | 3.33289 | 1.74016  | -0.937555 | 0.0002   | 0.0117098  |
| ZNF358  | NC_000019.10:7513879-7534009     | 12.5802 | 6.59871  | -0.930899 | 0.0007   | 0.0307735  |
| NNMT    | NC_000011.10:114295812-114312516 | 19.4155 | 10.1907  | -0.929962 | 5.00E-05 | 0.00377623 |

|          |                                  |         |          |           |          |            |
|----------|----------------------------------|---------|----------|-----------|----------|------------|
| HLA-F    | NC_000006.12:29723339-29749049   | 10.4424 | 5.48805  | -0.928089 | 0.00125  | 0.0466054  |
| HMGCS2   | NC_000001.11:119747995-119769125 | 86.5147 | 45.5703  | -0.924851 | 5.00E-05 | 0.00377623 |
| PLSCR1   | NC_000003.12:146515177-146544841 | 93.6336 | 49.7704  | -0.911739 | 5.00E-05 | 0.00377623 |
| CDKN1C   | NC_000011.10:2883217-2885804     | 7.77228 | 4.13937  | -0.908927 | 0.0004   | 0.020233   |
| CORO1A   | NC_000016.10:30183392-30189076   | 6.55071 | 3.4904   | -0.908258 | 0.00075  | 0.0322677  |
| MELTF    | NC_000003.12:197001739-197029816 | 15.3625 | 8.20154  | -0.905443 | 5.00E-05 | 0.00377623 |
| CDKN1A   | NC_000006.12:36676459-36687339   | 30.2909 | 16.19    | -0.903783 | 5.00E-05 | 0.00377623 |
| APOL1    | NC_000022.11:36253070-36267531   | 73.3644 | 39.2179  | -0.903567 | 5.00E-05 | 0.00377623 |
| CLIC3    | NC_000009.12:136994607-136997929 | 53.3757 | 28.6522  | -0.897539 | 5.00E-05 | 0.00377623 |
| FAM3D    | NC_000003.12:58505135-58706084   | 33.3341 | 17.9314  | -0.894512 | 5.00E-05 | 0.00377623 |
| P3H2     | NC_000003.12:189956727-190144846 | 6.97843 | 3.75801  | -0.892932 | 5.00E-05 | 0.00377623 |
| RGS16    | NC_000001.11:182598622-182604413 | 6.50438 | 3.50553  | -0.891781 | 0.00025  | 0.0139341  |
| PARM1    | NC_000004.12:74933074-75080901   | 2.21097 | 1.19219  | -0.891065 | 0.0005   | 0.023902   |
| CA2      | NC_000008.11:85438826-85481492   | 45.0742 | 24.3177  | -0.890293 | 5.00E-05 | 0.00377623 |
| MR1      | NC_000001.11:181033378-181061938 | 1.25083 | 0.678419 | -0.882638 | 0.0009   | 0.0363522  |
| STAT1    | NC_000002.12:190969035-191014250 | 71.1877 | 38.7303  | -0.878165 | 5.00E-05 | 0.00377623 |
| SELENBP1 | NC_000001.11:151364301-151372734 | 43.1518 | 23.5697  | -0.872491 | 5.00E-05 | 0.00377623 |
| OR51E1   | NC_000011.10:4643925-4655488     | 3.39203 | 1.85904  | -0.86759  | 0.00085  | 0.0351483  |
| PIK3AP1  | NC_000010.11:96587099-96720522   | 8.43957 | 4.64407  | -0.86178  | 5.00E-05 | 0.00377623 |
| NOX1     | NC_000023.11:100843323-100874345 | 25.875  | 14.2797  | -0.857588 | 5.00E-05 | 0.00377623 |
| C2orf72  | NC_000002.12:231037565-231049714 | 4.6422  | 2.5632   | -0.856863 | 0.00015  | 0.00930899 |
| SAMHD1   | NC_000020.11:36873070-36951843   | 16.6349 | 9.18573  | -0.856746 | 5.00E-05 | 0.00377623 |
| HLA-B    | NC_000006.12:31353865-31357245   | 15.8849 | 8.77853  | -0.855603 | 0.00015  | 0.00930899 |
| SOSTDC1  | NC_000007.14:16461480-16496513   | 8.23663 | 4.55802  | -0.853646 | 0.0007   | 0.0307735  |
| APOL2    | NC_000022.11:36226208-36239954   | 31.3053 | 17.3461  | -0.851799 | 5.00E-05 | 0.00377623 |
| IRF7     | NC_000011.10:612554-615999       | 51.6894 | 28.6415  | -0.851761 | 5.00E-05 | 0.00377623 |
| HPGD     | NC_000004.12:174490176-174541049 | 11.6522 | 6.45688  | -0.851697 | 5.00E-05 | 0.00377623 |
| GGT1     | NC_000022.11:24583749-24629005   | 15.1651 | 8.40349  | -0.851697 | 5.00E-05 | 0.00377623 |
| TAP1     | NC_000006.12:32840716-32853971   | 15.0916 | 8.36626  | -0.851093 | 0.001    | 0.039516   |
| IL17RE   | NC_000003.12:9902085-9916402     | 12.0954 | 6.71513  | -0.848969 | 5.00E-05 | 0.00377623 |
| PARP12   | NC_000007.14:140023743-140063721 | 21.9367 | 12.1792  | -0.848928 | 5.00E-05 | 0.00377623 |
| TNFSF10  | NC_000003.12:172505507-172523507 | 23.9149 | 13.3367  | -0.842507 | 5.00E-05 | 0.00377623 |
| PXDC1    | NC_000006.12:3722601-3752012     | 19.6238 | 10.9834  | -0.837283 | 5.00E-05 | 0.00377623 |
| FAM105A  | NC_000005.10:14581781-14616180   | 17.2444 | 9.67427  | -0.833899 | 5.00E-05 | 0.00377623 |
| HSPB1    | NC_000007.14:76302557-76304297   | 377.485 | 211.792  | -0.833773 | 5.00E-05 | 0.00377623 |
| CDHR5    | NC_000011.10:616564-625067       | 16.4447 | 9.25849  | -0.828775 | 5.00E-05 | 0.00377623 |
| CFH      | NC_000001.11:196651877-196747504 | 16.5425 | 9.33914  | -0.824819 | 0.0009   | 0.0363522  |

|         |                                  |         |         |           |          |            |
|---------|----------------------------------|---------|---------|-----------|----------|------------|
| CDH3    | NC_000016.10:68644819-68727573   | 4.72372 | 2.67536 | -0.820193 | 0.0001   | 0.00676519 |
| MYO7B   | NC_000002.12:127535688-127637728 | 2.67765 | 1.51946 | -0.81741  | 0.00035  | 0.018209   |
| NBL1    | NC_000001.11:19596976-19658456   | 44.5972 | 25.311  | -0.817188 | 0.00065  | 0.0291442  |
| AQP3    | NC_000009.12:33441153-33447633   | 79.7312 | 45.2851 | -0.816109 | 5.00E-05 | 0.00377623 |
| MSLN    | NC_000016.10:760745-768865       | 6.71097 | 3.82728 | -0.810201 | 0.0006   | 0.027416   |
| MYBL2   | NC_000020.11:43667018-43716496   | 112.68  | 64.4847 | -0.8052   | 5.00E-05 | 0.00377623 |
| GGT6    | NC_000017.11:4556926-4560596     | 15.0588 | 8.62062 | -0.804743 | 5.00E-05 | 0.00377623 |
| TMEM238 | NC_000019.10:55379243-55384259   | 39.58   | 22.7952 | -0.796038 | 0.00015  | 0.00930899 |
| AOC1    | NC_000007.14:150818963-150877309 | 36.0015 | 20.7941 | -0.791881 | 5.00E-05 | 0.00377623 |
| TCN2    | NC_000022.11:30607082-30627060   | 26.2698 | 15.1893 | -0.790352 | 5.00E-05 | 0.00377623 |
| VAMP5   | NC_000002.12:85584407-85593388   | 47.0174 | 27.2739 | -0.785671 | 0.00015  | 0.00930899 |
| DEGS2   | NC_000014.9:100146415-100166886  | 46.9666 | 27.3271 | -0.781302 | 5.00E-05 | 0.00377623 |
| PPP1R1B | NC_000017.11:39626207-39636625   | 63.6854 | 37.2082 | -0.775343 | 5.00E-05 | 0.00377623 |
| TSPAN4  | NC_000011.10:842823-867116       | 11.3134 | 6.62347 | -0.772368 | 0.0009   | 0.0363522  |
| NECTIN3 | NC_000003.12:111071758-111201444 | 13.7388 | 8.0501  | -0.771176 | 0.00035  | 0.018209   |
| PLIN2   | NC_000009.12:19108390-19127606   | 11.2308 | 6.60679 | -0.765442 | 0.00025  | 0.0139341  |
| IL15RA  | NC_000010.11:5948896-5978741     | 6.50805 | 3.8383  | -0.761759 | 0.0011   | 0.0422045  |
| KRT13   | NC_000017.11:41500980-41505613   | 13.0508 | 7.71907 | -0.757636 | 0.0002   | 0.0117098  |
| IGFBP2  | NC_000002.12:216632827-216664436 | 21.7493 | 12.8844 | -0.75534  | 0.00055  | 0.0257143  |
| NINJ1   | NC_000009.12:93121488-93134304   | 33.4916 | 19.8925 | -0.751575 | 5.00E-05 | 0.00377623 |
| SESN1   | NC_000006.12:108848409-109094505 | 11.6179 | 6.90696 | -0.750225 | 0.0001   | 0.00676519 |
| ASAP3   | NC_000001.11:23428562-23484631   | 3.44949 | 2.05104 | -0.750028 | 0.00135  | 0.048998   |
| ZG16B   | NC_000016.10:2830171-2832284     | 24.1402 | 14.3692 | -0.748456 | 0.00135  | 0.048998   |
| CCL15   | NC_000017.11:35983655-36059131   | 41.8381 | 24.9292 | -0.746984 | 0.0001   | 0.00676519 |
| LGALS4  | NC_000019.10:38801670-38813544   | 1115.86 | 667.725 | -0.740834 | 5.00E-05 | 0.00377623 |
| RHOD    | NC_000011.10:67056817-67072017   | 30.7428 | 18.4164 | -0.739256 | 5.00E-05 | 0.00377623 |
| IQGAP2  | NC_000005.10:76403254-76708132   | 9.71864 | 5.82701 | -0.737999 | 5.00E-05 | 0.00377623 |
| NENF    | NC_000001.11:212432886-212446379 | 37.8002 | 22.6877 | -0.736483 | 0.0001   | 0.00676519 |
| DDX60L  | NC_000004.12:168356734-168480514 | 4.2996  | 2.58439 | -0.734378 | 0.0001   | 0.00676519 |
| FOXA3   | NC_000019.10:45864259-45873797   | 13.6881 | 8.25434 | -0.729693 | 0.00035  | 0.018209   |
| CDH24   | NC_000014.9:23047060-23058476    | 6.56938 | 3.97123 | -0.726172 | 0.00075  | 0.0322677  |
| KCNK5   | NC_000006.12:39188970-39229475   | 16.8685 | 10.2061 | -0.7249   | 5.00E-05 | 0.00377623 |
| IRF9    | NC_000014.9:24161212-24166565    | 29.1482 | 17.6628 | -0.722695 | 0.0001   | 0.00676519 |
| AZGP1   | NC_000007.14:99966726-99976112   | 38.3646 | 23.3043 | -0.719179 | 5.00E-05 | 0.00377623 |
| HES1    | NC_000003.12:194136141-194138612 | 37.3534 | 22.7126 | -0.717742 | 5.00E-05 | 0.00377623 |
| P2RX4   | NC_000012.12:121121217-121234106 | 9.47461 | 5.76622 | -0.71644  | 0.00085  | 0.0351483  |
| CDR2L   | NC_000017.11:74987631-75005800   | 9.92815 | 6.04242 | -0.716399 | 5.00E-05 | 0.00377623 |

|          |                                  |         |         |           |          |            |
|----------|----------------------------------|---------|---------|-----------|----------|------------|
| HELZ2    | NC_000020.11:63558085-63574239   | 20.7858 | 12.6626 | -0.715026 | 5.00E-05 | 0.00377623 |
| CDC42EP5 | NC_000019.10:54465024-54473290   | 27.8949 | 17.0294 | -0.711971 | 0.00095  | 0.0380109  |
| HEPH     | NC_000023.11:66162525-66267389   | 15.1066 | 9.24692 | -0.708138 | 5.00E-05 | 0.00377623 |
| B2M      | NC_000015.10:44711486-44718159   | 1159.84 | 711.132 | -0.705739 | 5.00E-05 | 0.00377623 |
| PARP10   | NC_000008.11:143977151-143986471 | 15.095  | 9.25955 | -0.705053 | 0.00015  | 0.00930899 |
| LGALS9   | NC_000017.11:27631147-27649560   | 44.9719 | 27.735  | -0.697316 | 5.00E-05 | 0.00377623 |
| PARP14   | NC_000003.12:122680725-122730840 | 36.2684 | 22.389  | -0.695922 | 5.00E-05 | 0.00377623 |
| GJB1     | NC_000023.11:71215211-71225215   | 71.0491 | 43.8628 | -0.695818 | 5.00E-05 | 0.00377623 |
| PRSS8    | NC_000016.10:31131432-31135762   | 106.917 | 66.0117 | -0.695703 | 5.00E-05 | 0.00377623 |
| NRGN     | NC_000011.10:124739932-124747206 | 28.5145 | 17.6193 | -0.694542 | 0.00035  | 0.018209   |
| C19orf25 | NC_000019.10:1446267-1479552     | 15.3979 | 9.53075 | -0.692071 | 0.00025  | 0.0139341  |
| CLEC3A   | NC_000016.10:78022545-78032106   | 89.462  | 55.5785 | -0.686749 | 5.00E-05 | 0.00377623 |
| EBP      | NC_000023.11:48521775-48528716   | 131.17  | 81.9824 | -0.678057 | 5.00E-05 | 0.00377623 |
| FXYD3    | NC_000019.10:35115820-35124324   | 110.639 | 69.4182 | -0.672477 | 0.00045  | 0.0220627  |
| C19orf66 | NC_000019.10:10086118-10106194   | 14.8958 | 9.35096 | -0.671715 | 0.0005   | 0.023902   |
| ASF1B    | NC_000019.10:14119508-14136628   | 77.6034 | 48.7236 | -0.671499 | 5.00E-05 | 0.00377623 |
| WNT10A   | NC_000002.12:218859822-218893931 | 10.848  | 6.81986 | -0.669621 | 0.00115  | 0.0436419  |
| NEU1     | NC_000006.12:31859051-31862932   | 76.9441 | 48.4477 | -0.667383 | 5.00E-05 | 0.00377623 |
| EPN3     | NC_000017.11:50532686-50543750   | 10.7087 | 6.75049 | -0.665715 | 0.0002   | 0.0117098  |
| MGAT3    | NC_000022.11:39447165-39492194   | 3.83881 | 2.42268 | -0.664059 | 0.0011   | 0.0422045  |
| NR4A1    | NC_000012.12:52022831-52059507   | 11.3219 | 7.15013 | -0.663076 | 0.0005   | 0.023902   |
| MUC13    | NC_000003.12:124905441-124934751 | 111.043 | 70.2736 | -0.660059 | 5.00E-05 | 0.00377623 |
| C12orf57 | NC_000012.12:6943437-6946003     | 77.633  | 49.283  | -0.655578 | 0.00025  | 0.0139341  |
| CRABP2   | NC_000001.11:156699605-156712900 | 532.611 | 338.947 | -0.652023 | 5.00E-05 | 0.00377623 |
| FBP1     | NC_000009.12:94603132-94640257   | 96.7572 | 61.6478 | -0.65032  | 5.00E-05 | 0.00377623 |
| TGFBI    | NC_000005.10:136021543-136063818 | 25.5914 | 16.3077 | -0.650105 | 0.00015  | 0.00930899 |
| NMB      | NC_000015.10:84655128-84658611   | 50.0261 | 31.9028 | -0.648996 | 0.00045  | 0.0220627  |
| CRAT     | NC_000009.12:129094793-129110791 | 36.0459 | 23.0017 | -0.648096 | 5.00E-05 | 0.00377623 |
| RAB26    | NC_000016.10:2148143-2154165     | 16.509  | 10.5739 | -0.642744 | 0.00085  | 0.0351483  |
| WNT11    | NC_000011.10:76186325-76210842   | 19.6365 | 12.6437 | -0.635124 | 0.0008   | 0.0338484  |
| RGS2     | NC_000001.11:192809038-192812277 | 39.2711 | 25.2914 | -0.63482  | 0.00015  | 0.00930899 |
| BTG2     | NC_000001.11:203305535-203309602 | 27.6493 | 17.8544 | -0.630965 | 0.0001   | 0.00676519 |
| PLD1     | NC_000003.12:171600403-171810494 | 12.0577 | 7.79233 | -0.629831 | 0.00105  | 0.0410261  |
| DGAT2    | NC_000011.10:75768732-75801536   | 14.7608 | 9.56564 | -0.625836 | 0.00065  | 0.0291442  |
| SLC10A3  | NC_000023.11:154487305-154490690 | 42.7257 | 27.7344 | -0.623426 | 5.00E-05 | 0.00377623 |
| TPPP3    | NC_000016.10:67389806-67393535   | 110.194 | 71.5791 | -0.62244  | 5.00E-05 | 0.00377623 |
| AQP5     | NC_000012.12:49950740-49978444   | 40.009  | 26.0199 | -0.620707 | 0.0006   | 0.027416   |

|           |                                  |         |         |           |          |            |
|-----------|----------------------------------|---------|---------|-----------|----------|------------|
| LGALS3    | NC_000014.9:55129216-55145430    | 78.0749 | 50.8697 | -0.618054 | 5.00E-05 | 0.00377623 |
| LAP3      | NC_000004.12:17577303-17607967   | 65.5759 | 42.7441 | -0.617441 | 5.00E-05 | 0.00377623 |
| PSME2     | NC_000014.9:24143364-24160661    | 171.49  | 111.93  | -0.615528 | 0.0009   | 0.0363522  |
| EFNA1     | NC_000001.11:155127872-155134910 | 27.9665 | 18.2621 | -0.614848 | 0.00075  | 0.0322677  |
| BGN       | NC_000023.11:153447664-153509554 | 48.1792 | 31.4837 | -0.613807 | 0.00045  | 0.0220627  |
| E2F1      | NC_000020.11:33675485-33686404   | 37.0006 | 24.1823 | -0.613594 | 0.00025  | 0.0139341  |
| RAP1GAP   | NC_000001.11:21596214-21669444   | 57.1539 | 37.3666 | -0.613104 | 5.00E-05 | 0.00377623 |
| TCEAL9    | NC_000023.11:103356451-103358469 | 51.7985 | 33.9291 | -0.61039  | 0.00035  | 0.018209   |
| REEP6     | NC_000019.10:1491165-1497925     | 73.1266 | 48.1003 | -0.60435  | 0.0001   | 0.00676519 |
| FUCA1     | NC_000001.11:23845076-23868369   | 44.7016 | 29.4179 | -0.603632 | 0.0002   | 0.0117098  |
| ACOT11    | NC_000001.11:54548133-54634744   | 12.3771 | 8.1502  | -0.602766 | 0.0008   | 0.0338484  |
| RMI2      | NC_000016.10:11249004-11523825   | 38.3233 | 25.2384 | -0.602601 | 0.00095  | 0.0380109  |
| MCAM      | NC_000011.10:119308523-119317132 | 22.3692 | 14.7325 | -0.602509 | 0.0002   | 0.0117098  |
| SYT7      | NC_000011.10:61513715-61588404   | 15.0129 | 9.89807 | -0.600983 | 0.0002   | 0.0117098  |
| IFITM2    | NC_000011.10:308106-309410       | 110.472 | 72.8402 | -0.600875 | 0.0002   | 0.0117098  |
| CCND3     | NC_000006.12:41934932-42048894   | 58.0808 | 38.5237 | -0.592314 | 0.0001   | 0.00676519 |
| FCGRT     | NC_000019.10:49512278-49526428   | 112.03  | 74.3203 | -0.592062 | 0.0002   | 0.0117098  |
| QPRT      | NC_000016.10:29670587-29698699   | 46.8248 | 31.0655 | -0.591963 | 0.00025  | 0.0139341  |
| MAPK3     | NC_000016.10:30114104-30123309   | 43.8144 | 29.0984 | -0.590465 | 0.0006   | 0.027416   |
| CALM3     | NC_000019.10:46601254-46625118   | 301.256 | 200.09  | -0.590341 | 5.00E-05 | 0.00377623 |
| TUBA1B    | NC_000012.12:49127781-49131521   | 722.269 | 480.143 | -0.589071 | 0.0003   | 0.0161565  |
| PXMP2     | NC_000012.12:132687605-132704991 | 51.6483 | 34.3554 | -0.588185 | 0.00085  | 0.0351483  |
| TDRD7     | NC_000009.12:97412019-97496125   | 13.8804 | 9.25517 | -0.584716 | 0.0011   | 0.0422045  |
| CENPM     | NC_000022.11:41927746-41947164   | 41.9827 | 27.9988 | -0.584431 | 0.00135  | 0.048998   |
| KLHDC7A   | NC_000001.11:18480929-18485999   | 8.67603 | 5.79118 | -0.583178 | 0.0007   | 0.0307735  |
| CPTP      | NC_000001.11:1324755-1328896     | 25.129  | 16.7791 | -0.582686 | 0.00035  | 0.018209   |
| LMO4      | NC_000001.11:87328467-87348923   | 32.3606 | 21.6108 | -0.582488 | 0.0001   | 0.00676519 |
| HOXA11-AS | NC_000007.14:27185407-27189293   | 32.2607 | 21.5443 | -0.582473 | 0.00105  | 0.0410261  |
| TRIM21    | NC_000011.10:4384896-4393696     | 22.3151 | 14.9514 | -0.577742 | 0.0012   | 0.0452256  |
| ACSF2     | NC_000017.11:50426157-50474845   | 43.4267 | 29.1343 | -0.575861 | 0.00025  | 0.0139341  |
| MTSS1L    | NC_000016.10:70661203-70686207   | 12.5524 | 8.42574 | -0.575091 | 0.0003   | 0.0161565  |
| NPDC1     | NC_000009.12:137039456-137046224 | 63.4853 | 42.7274 | -0.57126  | 0.00015  | 0.00930899 |
| CST3      | NC_000020.11:23627896-23638048   | 294.995 | 199.255 | -0.566076 | 5.00E-05 | 0.00377623 |
| ATP1B1    | NC_000001.11:169106708-169462221 | 297.791 | 201.201 | -0.565659 | 0.00035  | 0.018209   |
| ATP1B3    | NC_000003.12:141876627-141926540 | 70.0037 | 47.479  | -0.56014  | 5.00E-05 | 0.00377623 |
| FEN1      | NC_000011.10:61792636-61797244   | 102.107 | 69.3154 | -0.558831 | 0.0002   | 0.0117098  |
| NPC2      | NC_000014.9:74479939-74493475    | 101.245 | 68.7504 | -0.558415 | 0.00055  | 0.0257143  |

|          |                                  |         |         |           |          |            |
|----------|----------------------------------|---------|---------|-----------|----------|------------|
| HLA-C    | NC_000006.12:31268748-31272136   | 57.051  | 38.9024 | -0.552393 | 0.00085  | 0.0351483  |
| ID2      | NC_000002.12:8681982-8684453     | 60.2716 | 41.1031 | -0.55223  | 0.0005   | 0.023902   |
| IL22RA1  | NC_000001.11:24119770-24143285   | 27.4222 | 18.7548 | -0.548089 | 0.0005   | 0.023902   |
| CD81     | NC_000011.10:2328748-2397419     | 254.252 | 173.937 | -0.547693 | 0.0004   | 0.020233   |
| RTN4R    | NC_000022.11:20241414-20268293   | 30.2838 | 20.7271 | -0.547026 | 0.0013   | 0.0479098  |
| CYSTM1   | NC_000005.10:140175067-140243789 | 278.611 | 190.757 | -0.546511 | 5.00E-05 | 0.00377623 |
| SP6      | NC_000017.11:47844907-47876312   | 23.016  | 15.7918 | -0.543456 | 0.00035  | 0.018209   |
| RPS9P2   | NC_000022.11:41063995-41064705   | 178.373 | 122.41  | -0.543176 | 0.0005   | 0.023902   |
| S100A14  | NC_000001.11:153614254-153616917 | 146.946 | 101.1   | -0.539508 | 0.00055  | 0.0257143  |
| SEPW1    | NC_000019.10:47778584-47784682   | 186.75  | 129.304 | -0.530344 | 0.00045  | 0.0220627  |
| WFS1     | NC_000004.12:6260367-6308709     | 41.9984 | 29.0882 | -0.529901 | 0.0004   | 0.020233   |
| OAZ2     | NC_000015.10:64687573-64703281   | 71.0834 | 49.3067 | -0.527728 | 0.00045  | 0.0220627  |
| FGFR3    | NC_000004.12:1793298-1808872     | 21.453  | 14.8921 | -0.526632 | 0.0011   | 0.0422045  |
| ITM2C    | NC_000002.12:230864597-230879254 | 133.684 | 93.0923 | -0.522091 | 0.00065  | 0.0291442  |
| PRR15L   | NC_000017.11:47951966-47957905   | 50.8797 | 35.4701 | -0.520488 | 0.00135  | 0.048998   |
| AGR2     | NC_000007.14:16791810-16805114   | 587.194 | 410.12  | -0.517793 | 0.00055  | 0.0257143  |
| IDI1     | NC_000010.11:1018906-1056716     | 70.2326 | 49.2373 | -0.51239  | 0.00045  | 0.0220627  |
| DHCR24   | NC_000001.11:54849626-54887248   | 211.115 | 148.296 | -0.509546 | 0.0007   | 0.0307735  |
| GUSB     | NC_000007.14:65960683-65982314   | 55.8062 | 39.217  | -0.508946 | 0.001    | 0.039516   |
| VWA1     | NC_000001.11:1430156-1442882     | 56.4819 | 39.7626 | -0.506377 | 0.0004   | 0.020233   |
| TMEM54   | NC_000001.11:32885964-32901435   | 323.199 | 227.583 | -0.506033 | 0.0004   | 0.020233   |
| SLBP     | NC_000004.12:1692730-1712741     | 57.0828 | 40.297  | -0.502384 | 0.00085  | 0.0351483  |
| FTH1P20  | NC_000002.12:180692103-180916939 | 213.278 | 302.447 | 0.503945  | 0.00075  | 0.0322677  |
| ND1      | NC_012920.1:3306-4262            | 543.642 | 771.45  | 0.504914  | 0.0008   | 0.0338484  |
| HK2      | NC_000002.12:74832654-74893354   | 14.3402 | 20.3678 | 0.506223  | 0.0011   | 0.0422045  |
| ATP9A    | NC_000020.11:51596774-51768411   | 35.3742 | 50.3027 | 0.50794   | 0.0003   | 0.0161565  |
| TEAD1    | NC_000011.10:12674421-12944737   | 13.1709 | 18.7602 | 0.510322  | 0.00025  | 0.0139341  |
| MED13    | NC_000017.11:61942604-62065983   | 11.2171 | 15.9787 | 0.510442  | 0.0007   | 0.0307735  |
| BBX      | NC_000003.12:107522935-107811329 | 11.1661 | 15.9278 | 0.512419  | 0.00085  | 0.0351483  |
| FAM208B  | NC_000010.11:5684758-5763740     | 9.0796  | 12.9872 | 0.516385  | 0.00075  | 0.0322677  |
| HMGB3    | NC_000023.11:150980507-150990775 | 19.3756 | 27.726  | 0.516998  | 0.00085  | 0.0351483  |
| FTH1P10  | NC_000005.10:17353712-17354631   | 262.302 | 375.543 | 0.517753  | 0.00015  | 0.00930899 |
| NTSR1    | NC_000020.11:62708769-62762771   | 36.9341 | 52.9946 | 0.52089   | 0.0009   | 0.0363522  |
| NF1      | NC_000017.11:31094926-31377677   | 14.7526 | 21.228  | 0.524999  | 0.0004   | 0.020233   |
| MUC5AC   | NC_000011.10:1157952-1201138     | 3.02008 | 4.3591  | 0.529442  | 0.0011   | 0.0422045  |
| RICTOR   | NC_000005.10:38845857-39074421   | 4.80669 | 6.95436 | 0.532873  | 0.0008   | 0.0338484  |
| KIAA0430 | NC_000016.10:15434467-15643166   | 5.68016 | 8.22526 | 0.534129  | 0.0013   | 0.0479098  |

|          |                                  |         |         |          |          |            |
|----------|----------------------------------|---------|---------|----------|----------|------------|
| SOCS7    | NC_000017.11:38351875-38405593   | 9.3671  | 13.5713 | 0.534885 | 0.0007   | 0.0307735  |
| CHD9     | NC_000016.10:53054990-53327502   | 3.07985 | 4.46502 | 0.535808 | 0.00105  | 0.0410261  |
| EGFR     | NC_000007.14:55019031-55207338   | 6.46922 | 9.4279  | 0.543345 | 0.001    | 0.039516   |
| MAN1A2   | NC_000001.11:117367392-117528872 | 8.24394 | 12.0274 | 0.544921 | 0.00125  | 0.0466054  |
| TAOK1    | NC_000017.11:29390924-29551904   | 7.01893 | 10.248  | 0.546019 | 0.0003   | 0.0161565  |
| ABLIM3   | NC_000005.10:149141482-149260439 | 15.4052 | 22.5027 | 0.546674 | 0.00025  | 0.0139341  |
| DSP      | NC_000006.12:7540113-7586717     | 12.0974 | 17.6837 | 0.54772  | 0.00025  | 0.0139341  |
| SRRM2    | NC_000016.10:2737075-2771412     | 39.8305 | 58.2348 | 0.54801  | 0.0006   | 0.027416   |
| ND2      | NC_012920.1:4469-5511            | 469.47  | 686.78  | 0.548816 | 0.00035  | 0.018209   |
| CAD      | NC_000002.12:27217256-27243792   | 11.9642 | 17.5029 | 0.548867 | 0.00025  | 0.0139341  |
| HIPK2    | NC_000007.14:139561569-139777894 | 3.68809 | 5.39885 | 0.549777 | 0.00035  | 0.018209   |
| CDK6     | NC_000007.14:92604920-92917187   | 6.81181 | 10.0217 | 0.557011 | 0.0002   | 0.0117098  |
| ZNF587   | NC_000019.10:57849812-57865123   | 8.57899 | 12.627  | 0.557638 | 0.00045  | 0.0220627  |
| FKTN     | NC_000009.12:105554034-105655950 | 3.40622 | 5.01776 | 0.558873 | 0.00075  | 0.0322677  |
| SLC3A2   | NC_000011.10:62856011-62888883   | 90.8293 | 133.857 | 0.559459 | 5.00E-05 | 0.00377623 |
| XPOT     | NC_000012.12:64404349-64451125   | 32.537  | 48.0456 | 0.562322 | 0.0001   | 0.00676519 |
| HIF0     | NC_000022.11:37805106-37807436   | 133.092 | 197.127 | 0.5667   | 0.0002   | 0.0117098  |
| FAT1     | NC_000004.12:186587782-186726915 | 21.5312 | 31.9228 | 0.568163 | 5.00E-05 | 0.00377623 |
| MACF1    | NC_000001.11:39084166-39487138   | 7.79624 | 11.5593 | 0.568199 | 0.00075  | 0.0322677  |
| BNIP2    | NC_000015.10:59659145-59689534   | 8.46531 | 12.5634 | 0.569595 | 0.00035  | 0.018209   |
| TIPARP   | NC_000003.12:156673170-156706770 | 21.6056 | 32.1724 | 0.574423 | 0.0001   | 0.00676519 |
| ZFC3H1   | NC_000012.12:71609598-71680648   | 5.12783 | 7.64805 | 0.576742 | 0.00065  | 0.0291442  |
| MACC1    | NC_000007.14:19918980-20217390   | 3.83359 | 5.71933 | 0.577151 | 0.00055  | 0.0257143  |
| PPP1R15A | NC_000019.10:48872391-48876062   | 28.2211 | 42.1381 | 0.578353 | 0.00015  | 0.00930899 |
| ARID2    | NC_000012.12:45729682-45908037   | 3.50095 | 5.23995 | 0.581808 | 0.0009   | 0.0363522  |
| TTC14    | NC_000003.12:180481502-180679495 | 8.21289 | 12.3046 | 0.583234 | 0.00135  | 0.048998   |
| ATRX     | NC_000023.11:77504877-77786269   | 7.5539  | 11.3205 | 0.583643 | 5.00E-05 | 0.00377623 |
| KIAA1109 | NC_000004.12:122152332-122362759 | 3.99599 | 5.99238 | 0.584573 | 0.0002   | 0.0117098  |
| HECTD1   | NC_000014.9:31100114-31208060    | 14.3138 | 21.4726 | 0.585098 | 0.00015  | 0.00930899 |
| ANXA3    | NC_000004.12:78551587-78610451   | 67.327  | 101.311 | 0.589534 | 5.00E-05 | 0.00377623 |
| EMP1     | NC_000012.12:13196667-13216774   | 9.10301 | 13.7109 | 0.590907 | 0.0009   | 0.0363522  |
| PRKDC    | NC_000008.11:47773107-47960183   | 18.2133 | 27.4753 | 0.593141 | 5.00E-05 | 0.00377623 |
| SEL1L    | NC_000014.9:81471546-81533864    | 8.2174  | 12.4011 | 0.593716 | 0.0011   | 0.0422045  |
| DUSP4    | NC_000008.11:29333061-29350750   | 4.94418 | 7.46468 | 0.594348 | 0.0008   | 0.0338484  |
| GLTSCR1L | NC_000006.12:42746957-42868560   | 3.65014 | 5.52861 | 0.598964 | 0.00135  | 0.048998   |
| PRRC2C   | NC_000001.11:171485495-171593511 | 11.8641 | 17.9816 | 0.599924 | 5.00E-05 | 0.00377623 |
| PHIP     | NC_000006.12:78867485-79078294   | 3.23961 | 4.91272 | 0.6007   | 0.00105  | 0.0410261  |



|         |                                  |         |         |          |          |            |
|---------|----------------------------------|---------|---------|----------|----------|------------|
| MYSM1   | NC_000001.11:58654738-58700091   | 3.21197 | 4.88497 | 0.60489  | 0.0007   | 0.0307735  |
| KIF14   | NC_000001.11:200551496-200620791 | 3.84757 | 5.86186 | 0.60741  | 0.0005   | 0.023902   |
| SGO2    | NC_000002.12:200510197-200584095 | 4.74619 | 7.23828 | 0.608875 | 0.0008   | 0.0338484  |
| EP400   | NC_000012.12:131949919-132080466 | 3.67189 | 5.60927 | 0.611288 | 0.00015  | 0.00930899 |
| LTN1    | NC_000021.9:28928143-28929259    | 3.40292 | 5.22155 | 0.617703 | 0.00075  | 0.0322677  |
| DST     | NC_000006.12:56457986-56954671   | 4.32121 | 6.63407 | 0.61846  | 0.0001   | 0.00676519 |
| AREG    | NC_000004.12:74445097-74455009   | 94.8225 | 145.63  | 0.619006 | 5.00E-05 | 0.00377623 |
| GCLM    | NC_000001.11:93885198-93909598   | 7.56234 | 11.6265 | 0.62051  | 0.0003   | 0.0161565  |
| ARFGF3  | NC_000006.12:138161689-138344663 | 3.27698 | 5.0413  | 0.62143  | 0.0001   | 0.00676519 |
| ATXN1   | NC_000006.12:16299111-16766883   | 4.16112 | 6.41068 | 0.623504 | 0.00065  | 0.0291442  |
| NRIP1   | NC_000021.9:14961234-15065903    | 9.68031 | 14.9273 | 0.624829 | 5.00E-05 | 0.00377623 |
| CENPF   | NC_000001.11:214603180-214664574 | 13.6763 | 21.11   | 0.626247 | 5.00E-05 | 0.00377623 |
| SLC7A5  | NC_000016.10:87830021-87869499   | 40.1707 | 62.0546 | 0.627393 | 5.00E-05 | 0.00377623 |
| FLNA    | NC_000023.11:154348528-154374638 | 47.1481 | 73.0588 | 0.63186  | 5.00E-05 | 0.00377623 |
| LRP8    | NC_000001.11:53226891-53328149   | 42.7676 | 66.4028 | 0.634725 | 0.00125  | 0.0466054  |
| ABHD2   | NC_000015.10:89088149-89202360   | 51.525  | 80.1365 | 0.637185 | 5.00E-05 | 0.00377623 |
| ANXA10  | NC_000004.12:168092524-168199047 | 71.0867 | 110.713 | 0.639167 | 5.00E-05 | 0.00377623 |
| MIB1    | NC_000018.10:21740792-21870957   | 5.28548 | 8.24955 | 0.642282 | 0.00075  | 0.0322677  |
| GCLC    | NC_000006.12:53497340-53545129   | 19.5468 | 30.5676 | 0.645068 | 5.00E-05 | 0.00377623 |
| CEACAM6 | NC_000019.10:41755420-41772211   | 8.10616 | 12.6793 | 0.64538  | 0.0011   | 0.0422045  |
| ZNF292  | NC_000006.12:87155550-87264172   | 2.45173 | 3.84993 | 0.651032 | 0.0003   | 0.0161565  |
| CAPN8   | NC_000001.11:223541608-223665734 | 17.2319 | 27.0913 | 0.652742 | 0.0002   | 0.0117098  |
| BTAF1   | NC_000010.11:91923768-92030998   | 5.17844 | 8.1431  | 0.653061 | 0.00015  | 0.00930899 |
| ZBTB41  | NC_000001.11:197153681-197200542 | 2.40056 | 3.77611 | 0.653532 | 0.00045  | 0.0220627  |
| AKAP11  | NC_000013.11:42271469-42323267   | 6.15062 | 9.6827  | 0.654678 | 5.00E-05 | 0.00377623 |
| TBC1D5  | NC_000003.12:17157161-17742739   | 3.67817 | 5.80004 | 0.657074 | 0.00055  | 0.0257143  |
| RBM33   | NC_000007.14:155644493-155781485 | 6.72548 | 10.6139 | 0.658242 | 5.00E-05 | 0.00377623 |
| FGF19   | NC_000011.10:69698237-69704338   | 29.6987 | 46.8797 | 0.658564 | 5.00E-05 | 0.00377623 |
| ADAM19  | NC_000005.10:157477303-157575823 | 3.73145 | 5.90408 | 0.661979 | 0.00025  | 0.0139341  |
| QSER1   | NC_000011.10:32892825-33015362   | 7.86245 | 12.4662 | 0.664972 | 5.00E-05 | 0.00377623 |
| ANKRD12 | NC_000018.10:9136752-9285985     | 3.2695  | 5.19173 | 0.667147 | 0.00045  | 0.0220627  |
| VPS13D  | NC_000001.11:12230038-12512047   | 1.86621 | 2.96495 | 0.667898 | 5.00E-05 | 0.00377623 |
| CEP350  | NC_000001.11:179954772-180114880 | 2.51543 | 4.00228 | 0.670016 | 5.00E-05 | 0.00377623 |
| BRCA2   | NC_000013.11:32315479-32399672   | 2.37144 | 3.77492 | 0.67068  | 0.0003   | 0.0161565  |
| ABCG1   | NC_000021.9:42199688-42304389    | 6.89775 | 10.9897 | 0.671958 | 0.0009   | 0.0363522  |
| DEPDC1  | NC_000001.11:68474151-68538627   | 6.44705 | 10.3004 | 0.675994 | 0.00015  | 0.00930899 |
| ZCCHC11 | NC_000001.11:52423274-52553463   | 3.84783 | 6.1547  | 0.677643 | 0.0003   | 0.0161565  |

|              |                                  |          |         |          |          |            |
|--------------|----------------------------------|----------|---------|----------|----------|------------|
| DGKH         | NC_000013.11:42040035-42256584   | 3.02129  | 4.83456 | 0.678219 | 0.0001   | 0.00676519 |
| MTX3         | NC_000005.10:79976715-79991267   | 1.87527  | 3.00513 | 0.680327 | 0.00075  | 0.0322677  |
| BDP1         | NC_000005.10:71455614-71578288   | 3.24263  | 5.20582 | 0.682962 | 5.00E-05 | 0.00377623 |
| SMG1         | NC_000016.10:18804852-18937762   | 7.03782  | 11.3111 | 0.684539 | 5.00E-05 | 0.00377623 |
| VPS13A       | NC_000009.12:77176755-77421537   | 3.4499   | 5.57324 | 0.691959 | 5.00E-05 | 0.00377623 |
| ANAPC1       | NC_000002.12:111766146-111884196 | 7.34977  | 11.9076 | 0.696118 | 0.00095  | 0.0380109  |
| SLC38A1      | NC_000012.12:46183054-46278613   | 31.7006  | 51.5983 | 0.702813 | 5.00E-05 | 0.00377623 |
| CYP1B1       | NC_000002.12:37920788-38076181   | 7.60455  | 12.4111 | 0.706699 | 5.00E-05 | 0.00377623 |
| UVSSA        | NC_000004.12:1345661-1388049     | 4.0506   | 6.63224 | 0.711361 | 0.0008   | 0.0338484  |
| UTP20        | NC_000012.12:101280126-101386619 | 2.66149  | 4.41517 | 0.730231 | 0.0001   | 0.00676519 |
| CASC5        | NC_000015.10:40594011-40664342   | 4.25433  | 7.05866 | 0.730461 | 5.00E-05 | 0.00377623 |
| TTBK2        | NC_000015.10:42738973-42920995   | 1.77098  | 2.94894 | 0.735647 | 0.0002   | 0.0117098  |
| BRWD3        | NC_000023.11:80669487-80809736   | 3.3231   | 5.5459  | 0.738892 | 0.0013   | 0.0479098  |
| LOC105369370 | NC_000011.10:69366824-69372512   | 2.57017  | 4.30615 | 0.744538 | 0.00025  | 0.0139341  |
| CALB2        | NC_000016.10:71358712-71392129   | 48.0807  | 80.7608 | 0.748198 | 5.00E-05 | 0.00377623 |
| DCBLD2       | NC_000003.12:98795969-98901689   | 43.0967  | 72.692  | 0.75422  | 5.00E-05 | 0.00377623 |
| PHLDA1       | NC_000012.12:76025446-76031776   | 21.4561  | 36.3713 | 0.761408 | 5.00E-05 | 0.00377623 |
| LPP          | NC_000003.12:188151205-188890671 | 3.1205   | 5.37336 | 0.784046 | 5.00E-05 | 0.00377623 |
| ATF3         | NC_000001.11:212565333-212620777 | 7.15249  | 12.3503 | 0.788026 | 5.00E-05 | 0.00377623 |
| ZKSCAN8      | NC_000006.12:28141643-28159472   | 2.65664  | 4.59228 | 0.789611 | 5.00E-05 | 0.00377623 |
| ZNF532       | NC_000018.10:58862599-58986480   | 4.00508  | 6.99848 | 0.805211 | 5.00E-05 | 0.00377623 |
| SNX29        | NC_000016.10:11976733-12574289   | 1.45527  | 2.54791 | 0.808025 | 0.0003   | 0.0161565  |
| TMTC2        | NC_000012.12:82686951-83134868   | 6.91152  | 12.1585 | 0.814891 | 5.00E-05 | 0.00377623 |
| CENPE        | NC_000004.12:103105805-103198409 | 3.82639  | 6.764   | 0.821893 | 5.00E-05 | 0.00377623 |
| GAS2L3       | NC_000012.12:100573660-100628288 | 2.82832  | 5.06214 | 0.839802 | 0.00085  | 0.0351483  |
| CREB3L2      | NC_000007.14:137874978-138002101 | 3.01024  | 5.43189 | 0.851575 | 0.00015  | 0.00930899 |
| REL          | NC_000002.12:60881494-60928171   | 1.31429  | 2.37967 | 0.85648  | 0.0002   | 0.0117098  |
| CREB5        | NC_000007.14:28299320-28825894   | 0.854062 | 1.55096 | 0.860748 | 0.00135  | 0.048998   |
| LGR6         | NC_000001.11:202193989-202319761 | 1.62151  | 2.97004 | 0.873147 | 0.001    | 0.039516   |
| SORBS1       | NC_000010.11:95311772-95561420   | 0.737856 | 1.36492 | 0.887403 | 5.00E-05 | 0.00377623 |
| PSD3         | NC_000008.11:18527302-19086909   | 1.47484  | 2.73411 | 0.890518 | 5.00E-05 | 0.00377623 |
| ASPM         | NC_000001.11:197084126-197146694 | 6.49836  | 12.1561 | 0.903533 | 5.00E-05 | 0.00377623 |
| NEAT1        | NC_000011.10:65422797-65445540   | 49.8066  | 94.0846 | 0.917622 | 5.00E-05 | 0.00377623 |
| CLIP4        | NC_000002.12:29097675-29183813   | 1.12211  | 2.1577  | 0.943287 | 0.00065  | 0.0291442  |
| XIST         | NC_000023.11:73792204-73852753   | 4.01727  | 7.8923  | 0.97423  | 5.00E-05 | 0.00377623 |
| FAM129A      | NC_000001.11:184791024-184975132 | 2.2605   | 4.45162 | 0.977689 | 5.00E-05 | 0.00377623 |
| EREG         | NC_000004.12:74365142-74388760   | 14.0173  | 27.6727 | 0.981257 | 5.00E-05 | 0.00377623 |

|           |                                  |          |         |          |          |            |
|-----------|----------------------------------|----------|---------|----------|----------|------------|
| ADGRF1    | NC_000006.12:46997702-47042363   | 5.7863   | 11.4912 | 0.989821 | 5.00E-05 | 0.00377623 |
| IGSF9B    | NC_000011.10:133908563-133956960 | 0.750953 | 1.50213 | 1.00021  | 0.0011   | 0.0422045  |
| PSAT1     | NC_000009.12:78297074-78330093   | 33.8886  | 70.913  | 1.06525  | 5.00E-05 | 0.00377623 |
| TTLL7     | NC_000001.11:83861110-83999340   | 0.730706 | 1.53107 | 1.06718  | 0.0012   | 0.0452256  |
| TTC6      | NC_000014.9:37595198-37842628    | 0.602631 | 1.26312 | 1.06764  | 0.0007   | 0.0307735  |
| ABCA1     | NC_000009.12:104781001-104939096 | 0.59561  | 1.27292 | 1.0957   | 5.00E-05 | 0.00377623 |
| LOC400706 | NC_000019.10:46057677-46077629   | 1.72067  | 3.68172 | 1.09741  | 0.0001   | 0.00676519 |
| CHAC1     | NC_000015.10:40942134-40956519   | 4.4221   | 9.46476 | 1.09783  | 5.00E-05 | 0.00377623 |
| CEMIP     | NC_000015.10:80779342-80989878   | 13.475   | 29.0212 | 1.10683  | 0.00055  | 0.0257143  |
| CTH       | NC_000001.11:70411217-70441949   | 2.07747  | 4.54347 | 1.12896  | 0.0002   | 0.0117098  |
| PTPRM     | NC_000018.10:7567315-8406861     | 0.75628  | 1.71462 | 1.18089  | 5.00E-05 | 0.00377623 |
| SLCO5A1   | NC_000008.11:69667045-69837829   | 0.505013 | 1.17902 | 1.22319  | 0.00085  | 0.0351483  |
| PGM5      | NC_000009.12:68355163-68531061   | 1.17393  | 2.76146 | 1.23409  | 0.0004   | 0.020233   |
| TNC       | NC_000009.12:115019574-115118257 | 0.940044 | 2.27738 | 1.27658  | 5.00E-05 | 0.00377623 |
| SERPINA3  | NC_000014.9:94612376-94624053    | 1.57644  | 4.09036 | 1.37556  | 0.0002   | 0.0117098  |
| LRRN4     | NC_000020.11:6040545-6054080     | 0.530669 | 1.39522 | 1.39461  | 0.00075  | 0.0322677  |
| SLC6A9    | NC_000001.11:43991246-44040680   | 0.799768 | 2.18878 | 1.45248  | 0.00115  | 0.0436419  |
| ASNS      | NC_000007.14:97852116-97872542   | 26.8663  | 89.2487 | 1.73203  | 5.00E-05 | 0.00377623 |
| SCEL      | NC_000013.11:77535673-77645263   | 2.62774  | 8.72945 | 1.73207  | 5.00E-05 | 0.00377623 |
| CYP1A1    | NC_000015.10:74719541-74725610   | 0.523368 | 1.76512 | 1.75387  | 5.00E-05 | 0.00377623 |
| SLC7A11   | NC_000004.12:138025237-138242418 | 5.73686  | 19.9331 | 1.79684  | 5.00E-05 | 0.00377623 |
| AKAP12    | NC_000006.12:151239814-151358559 | 1.51284  | 5.72766 | 1.92069  | 5.00E-05 | 0.00377623 |
| SPRR1B    | NC_000001.11:153031202-153032900 | 1.87231  | 8.19831 | 2.13051  | 5.00E-05 | 0.00377623 |

<sup>a</sup>LogFC: Log<sub>2</sub> of Fold Change

**Table S4.** Top ten differentially expressed genes (Down-regulated) by Avicquinone B

| Gene Symbol | Description                                                               | Function                                                                                   | Association with CRC                                                                                                                                                                                                                                             | LogFC  | q value |
|-------------|---------------------------------------------------------------------------|--------------------------------------------------------------------------------------------|------------------------------------------------------------------------------------------------------------------------------------------------------------------------------------------------------------------------------------------------------------------|--------|---------|
| IFITM1      | Interferon-induced transmembrane protein 1                                | IFN-induced antiviral protein                                                              | ↑ Expression in CRC tissue is associated with an aggressive phenotype and poor prognosis.                                                                                                                                                                        | -4.131 | 0.004   |
|             |                                                                           |                                                                                            | ↑ Proliferation and invasiveness of CRC cells (SW480 and DLD-1) with stable/ectopic over-expression of IFITM1.                                                                                                                                                   |        |         |
|             |                                                                           |                                                                                            | ↓ Migration/invasion ability of CRC cells (HT-29, LoVo, and DLD-1) with transient/stable knockdown of IFITM1. <sup>6-9</sup>                                                                                                                                     |        |         |
| LAPTM5      | Lysosomal-associated transmembrane protein 5                              | May have a special functional role during embryogenesis and in adult hematopoietic cells.  | Predicted target of hsa-miR-150, hsa-miR-16 and hsa-miR-28, miRNAs down-regulated in CRC tissue. <sup>10</sup>                                                                                                                                                   | -3.321 | 0.007   |
| IFI44L      | Interferon-induced protein 44-like                                        | Exhibits a low antiviral activity against hepatitis C virus.                               | ↑ Expression in KRAS-mutated CRC cell lines and patient-derived organoid culture.                                                                                                                                                                                | -3.307 | 0.004   |
|             |                                                                           |                                                                                            | ↑ Expression in HT-29 cells resistant to Oxaliplatin. <sup>11,12</sup>                                                                                                                                                                                           |        |         |
| RSAD2       | Radical S-adenosyl methionine domain-containing protein 2                 | Interferon-inducible iron-sulfur (4FE-4S) cluster-binding antiviral protein.               | ↑ Expression in CRC samples when compared to colorectal adenomas. <sup>13</sup>                                                                                                                                                                                  | -2.836 | 0.004   |
| EPSTI1      | Epithelial-stromal interaction protein 1                                  | -----                                                                                      | ↑ Expression in metastatic CRC cell lines compared to primary CRC cells.                                                                                                                                                                                         | -2.669 | 0.004   |
|             |                                                                           |                                                                                            | ↑ Expression in CRC cell lines with silenced expression of Nkx2-3, a transcription factor down regulated in CRC. <sup>14,15</sup>                                                                                                                                |        |         |
| TMEM40      | Transmembrane protein 40                                                  | -----                                                                                      | -----                                                                                                                                                                                                                                                            | -2.632 | 0.004   |
| TNNC1       | Troponin C (TN-C)                                                         | Troponin is the central regulatory protein of striated muscle contraction.                 | ↑ Expression in CRC cells (SW480) treated with the ligand of CXCR4 and CXCR7, chemokines receptors increased with tumor stage and size in CRC. <sup>16</sup>                                                                                                     | -2.521 | 0.004   |
| GPRC5B      | G-protein coupled receptor family C group 5 member B                      | Unknown                                                                                    | Targeted by hsa-miR-99b-5p, a miRNA down-regulated in CRC tissue. <sup>17</sup>                                                                                                                                                                                  | -2.482 | 0.004   |
| CMPK2       | UMP-CMP kinase 2, mitochondrial (cytidine/uridine monophosphate kinase 2) | May participate in dUTP and dCTP synthesis in mitochondria.                                | ↑ mRNA expression is correlated to a higher risk score in stages I-III CRC, DNA aneuploidy, and neoplastic progression. <sup>18,19</sup>                                                                                                                         | -2.411 | 0.004   |
| HOPX        | Homeodomain-only protein                                                  | Atypical homeodomain protein which is required to modulate cardiac growth and development. | Colon stem cell marker. ↓ Expression in CRC tissue, mainly in an epigenetic manner, which is associated with increased progression and metastasis. Forced expression of HOPX suppressed proliferation and invasion of CRC cells (HCT116 and DLD1). <sup>20</sup> | -2.406 | 0.004   |

**Table S5.** Top ten differentially expressed genes (Up-regulated) by Avicquinone B

| Gene Symbol | Description                                          | Function                                                                                                            | Association with CRC                                                                                                                                                                                                                                                                                                                                                                    | LogFC | q value |
|-------------|------------------------------------------------------|---------------------------------------------------------------------------------------------------------------------|-----------------------------------------------------------------------------------------------------------------------------------------------------------------------------------------------------------------------------------------------------------------------------------------------------------------------------------------------------------------------------------------|-------|---------|
| SPRR1B      | Cornifin-B                                           | Cross-linked envelope protein of keratinocytes.                                                                     | ↑ mRNA expression in HT-29 cells with knockdown expression of PHGR1, a possible protein marker of CRC development and metastasis. <sup>21</sup>                                                                                                                                                                                                                                         | 2.131 | 0.004   |
| AKAP12      | A-kinase anchor protein 12 (Gravin)                  | Anchoring protein that mediates the subcellular compartmentation of protein kinase A and C.                         | ↓ mRNA expression or methylation of gene promoter in CRC tissue.<br>► Tumor suppressor gene in CRC. Represents a potential molecular biomarker for predicting CRC malignancy.<br>► Induced re-expression of AKAP12 promoted apoptosis, reduced colony formation and migration of LoVo cells <i>in vitro</i> and <i>in vivo</i> . <sup>22-24</sup>                                       | 1.921 | 0.004   |
| SLC7A11     | Cystine/glutamate transporter (xCT)                  | High affinity exchange of anionic aminoacids.                                                                       | ↓ Protein expression in metastatic CRC cells. <sup>25</sup>                                                                                                                                                                                                                                                                                                                             | 1.797 | 0.004   |
| CYP1A1      | Cytochrome P450 1A1                                  | Heme-thiolate monooxygenase that oxidizes a variety of compounds, including xenobiotics.                            | ► Polymorphisms in CYP1A1 gene are associated with increased risk of CRC development.<br>► Key metabolizing enzyme of polycyclic aromatic hydrocarbons (i.e. benzo[a]pyrene) which are considered important carcinogens. <sup>26-28</sup>                                                                                                                                               | 1.754 | 0.004   |
| SCEL        | Sciellin                                             | May function in the assembly or regulation of proteins in the cornified envelope.                                   | ↓ Expression in specimens from CRC patients with metastasis.<br>↓ Expression in CRC metastatic cell lines promoted migration and invasion, while overexpression had the opposite effect. <sup>29</sup>                                                                                                                                                                                  | 1.732 | 0.004   |
| ASNS        | Asparagine synthetase [glutamine-hydrolyzing]        | Synthesizes de novo asparagine from aspartate and glutamine                                                         | ↑ mRNA expression in CRC cells (i.e. SW620 and HT-29) treated with anti-carcinogenic compounds.<br>↑ Expression in KRAS-mutated CRC cells/tissue, through the PI3K-AKT-mTOR pathway, is an important metabolic adaptation to support growth and survival. Silencing of ASNS diminished the proliferation of KRAS-mutant CRC cells <i>in vitro</i> and <i>in vivo</i> . <sup>30-32</sup> | 1.732 | 0.004   |
| SLC6A9      | Sodium- and chloride-dependent glycine transporter 1 | Terminates the action of glycine by its high affinity sodium-dependent reuptake into presynaptic terminals.         | ↑ mRNA expression when CRC cells (i.e. HCT-116 or RKO) were treated with protopanaxadiol, a cytotoxic metabolite from <i>P. quinquefolius</i> L., or Zinc during hypoxia. <sup>33,34</sup>                                                                                                                                                                                              | 1.452 | 0.044   |
| LRRN4       | Leucine-rich repeat neuronal protein 4               | May play an important role in hippocampus-dependent long-lasting memory.                                            | Identified as a low abundance protein in CRC tissues. <sup>35</sup>                                                                                                                                                                                                                                                                                                                     | 1.395 | 0.032   |
| SERPINA3    | Alpha-1-antichymotrypsin (Serpina3)                  | Serine protease inhibitor, specific against neutrophil cathepsin G, mast cell chymase, and pancreatic chymotrypsin. | ↓ Expression in CRC samples (affected tissue, SW620 metastatic cells, HT-29 malignant colonospheres) when compared to paired normal samples.<br>↑ Expression in disseminated than localized CRC.<br>↑ Levels in serum/plasma levels of CRC patients when compared to patients with polyps or healthy. <sup>36-38</sup>                                                                  | 1.376 | 0.012   |
| TNC         | Tenascin                                             | Extracellular matrix protein that, in tumors, stimulates angiogenesis                                               | ↑ Expression in CRC tissue (mainly by cancer associated fibroblasts) that promote survival, proliferation, and invasiveness of CRC cells by induction of angiogenesis and metastasis, particularly to the liver. <sup>39,40</sup>                                                                                                                                                       | 1.277 | 0.004   |

## Supplementary Figures

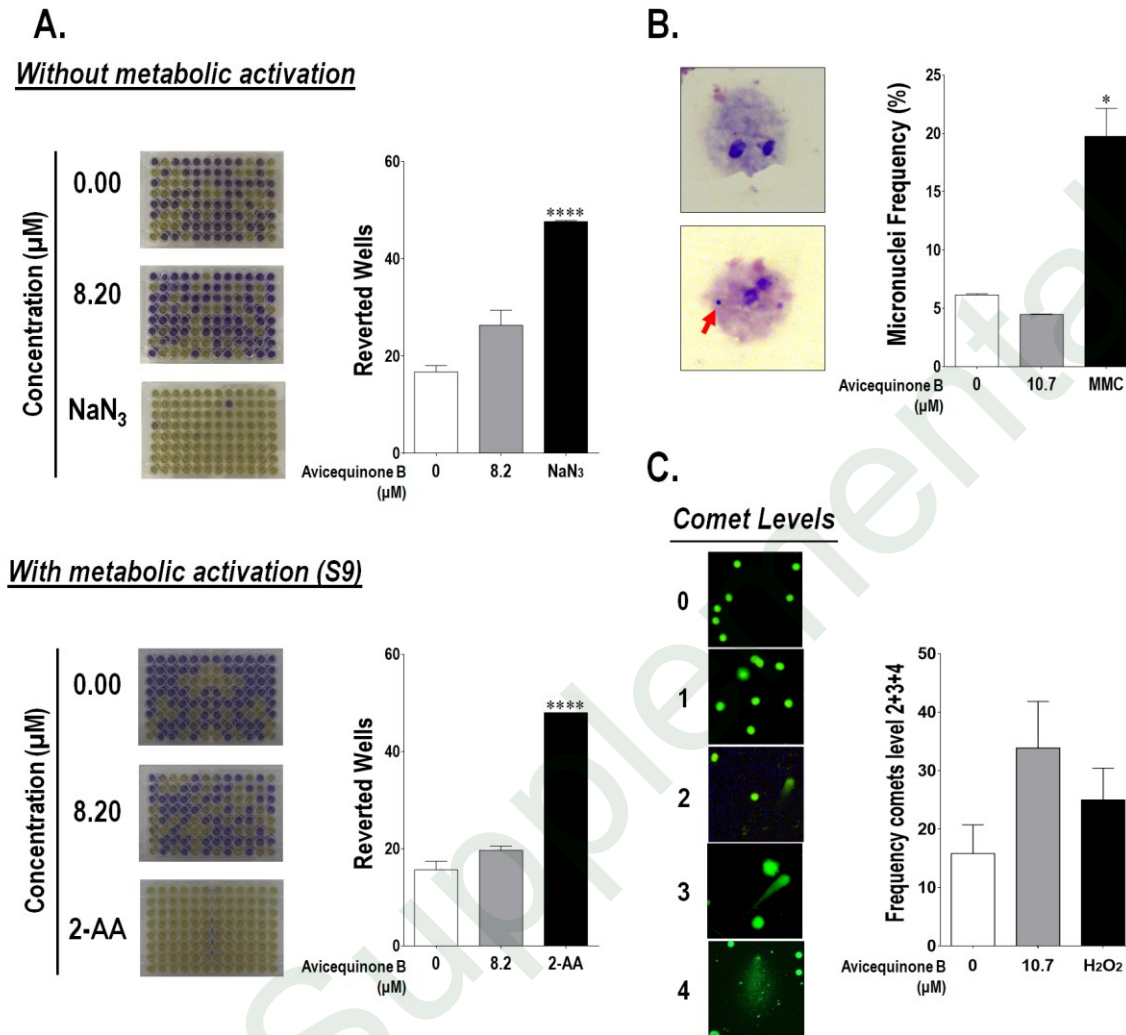

**Figure S1. Avicquinone B did not induce mutagenic or genotoxic effects *in vitro*.** (A) Ames test was performed using *Salmonella typhimurium* (TA100) treated with vehicle (DMSO, control), avicquinone B (8.20  $\mu\text{M}$ ), sodium azide ( $\text{NaN}_3$ ), or 2-aminoanthracene (2-AA), with and without S9 metabolic activation. Mutagenic effect was scored visually; yellow wells were counted as positive whereas purple wells counted as negative. The frequency of reverted wells is plotted in a bar graph. Results are representative of two independent experiments, and are expressed as the mean  $\pm$  S.E.M. ( $n=4-11$  per group). (\*\*\*\*)  $p<0.0001$  vs. control group. (B) Micronucleus assay was performed using 3T3-L1 fibroblasts treated with vehicle (DMSO, control), avicquinone B (10.7  $\mu\text{M}$ ) or mitomycin (MMC, 0.5  $\mu\text{M}$ ) for 30 h, before blocking the cytokinesis with cytochalasin. Representative pictures of a fibroblast Vs. micronucleated fibroblasts are shown; (Wright's Stain; 100X). The frequency of micronucleated fibroblasts is plotted in a bar graph. Results are representative of two independent experiments, and are expressed as the mean  $\pm$  S.E.M. ( $n=5-10$  per group). (\*)  $p<0.05$  vs. control group. (C) Comet assay was performed using 3T3-L1 fibroblasts treated with vehicle (DMSO, control), avicquinone B (10.7  $\mu\text{M}$ ) or hydrogen peroxide (150  $\mu\text{M}$ ) before neutral DNA-electrophoresis. Representative pictures of comet tails for each scored population assigned by three blinded investigators are shown (SYBER green stain; 10X). The frequency of comets with medium to complete DNA-damage was plotted in a bar graph. Results are representative of two independent experiments, and are expressed as the mean  $\pm$  S.E.M. ( $n=4$  per group).

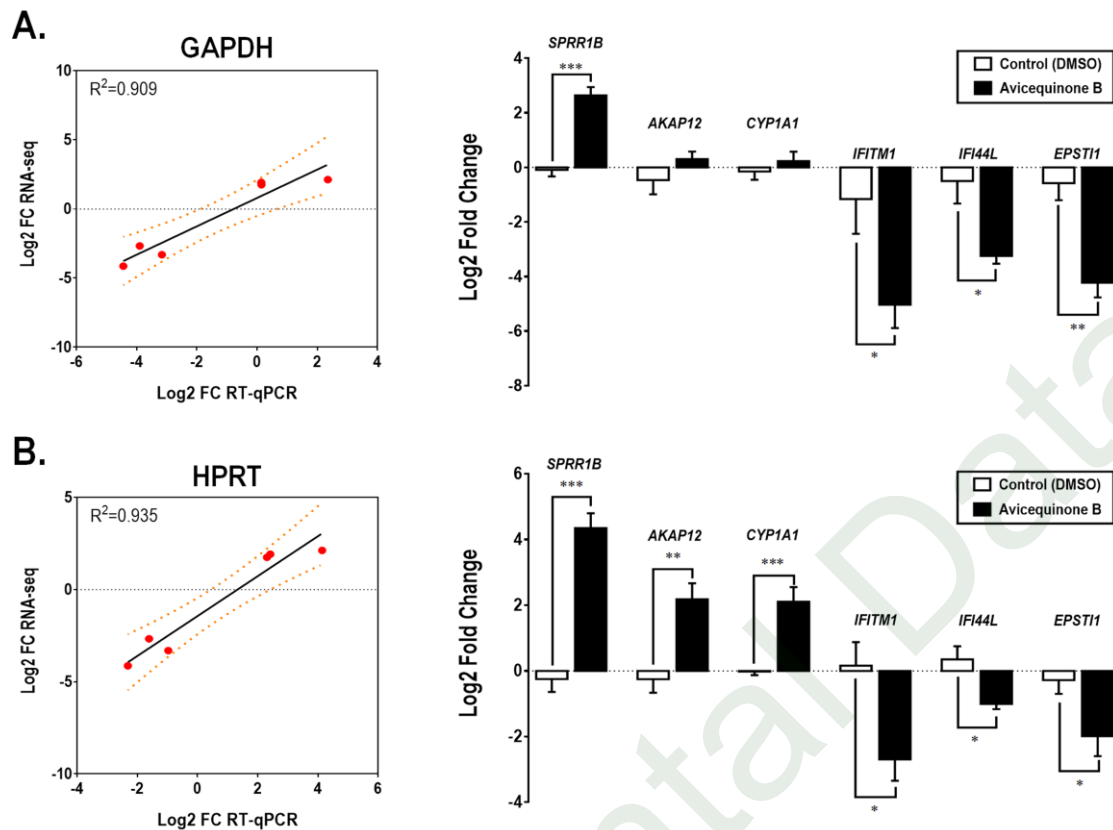

**Figure S2. RT-qPCR validation of RNA-seq results.** Six genes were selected to confirm the differential expression using the same samples used for RNA-seq ( $n=3$ ) with RT-qPCR. Results were plotted as the correlation and linear regression analysis between RNA-seq and RT-qPCR data (Log<sub>2</sub>FC-fold change), in addition to the detailed results from the RT-qPCR analysis of selected genes when using (A) GAPDH or (B) HPRT as endogenous housekeeping genes. Data are expressed as mean  $\pm$  S.E.M ( $n=3-6$  per group), \* $p<0.05$ , \*\* $p<0.01$ , \*\*\* $p<0.001$ , \*\*\*\* $p<0.0001$ , as calculated by unpaired t-test with Welch's correction when required.

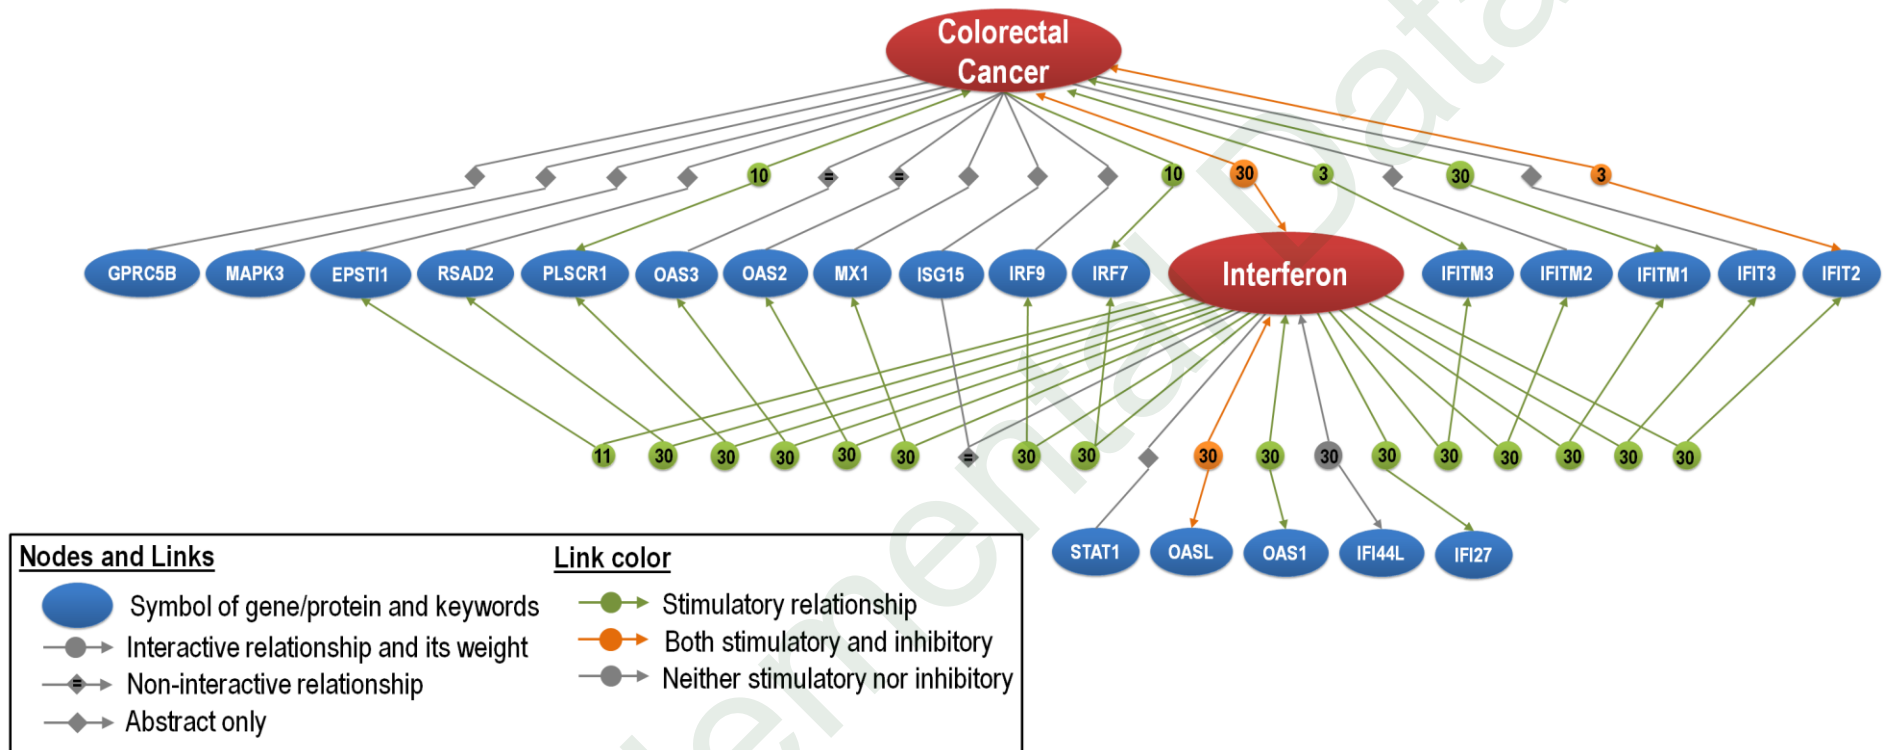

**Figure S3. Colorectal cancer, interferon, and interferon regulated genes (IRGs) are strongly related.** Text-mining was applied using Chillibot (<http://www.chilibot.net/>) searching for interactions between differentially expressed IRGs (CMPK2, EPSTI1, GPRC5B, IFI27, IFI44L, IFIT1, IFIT2, IFIT3, IFITM1, IFITM2, IFITM3, IRF7, IRF9, ISG15, MAPK3, MAPK11, MAPK12, MX1, OAS1, OAS2, OAS3, OASL, PLSR1, RSAD2, STAT1, TNNC1), and the root keywords “Colorectal cancer” and “Interferon”. Updated December 07, 2018.



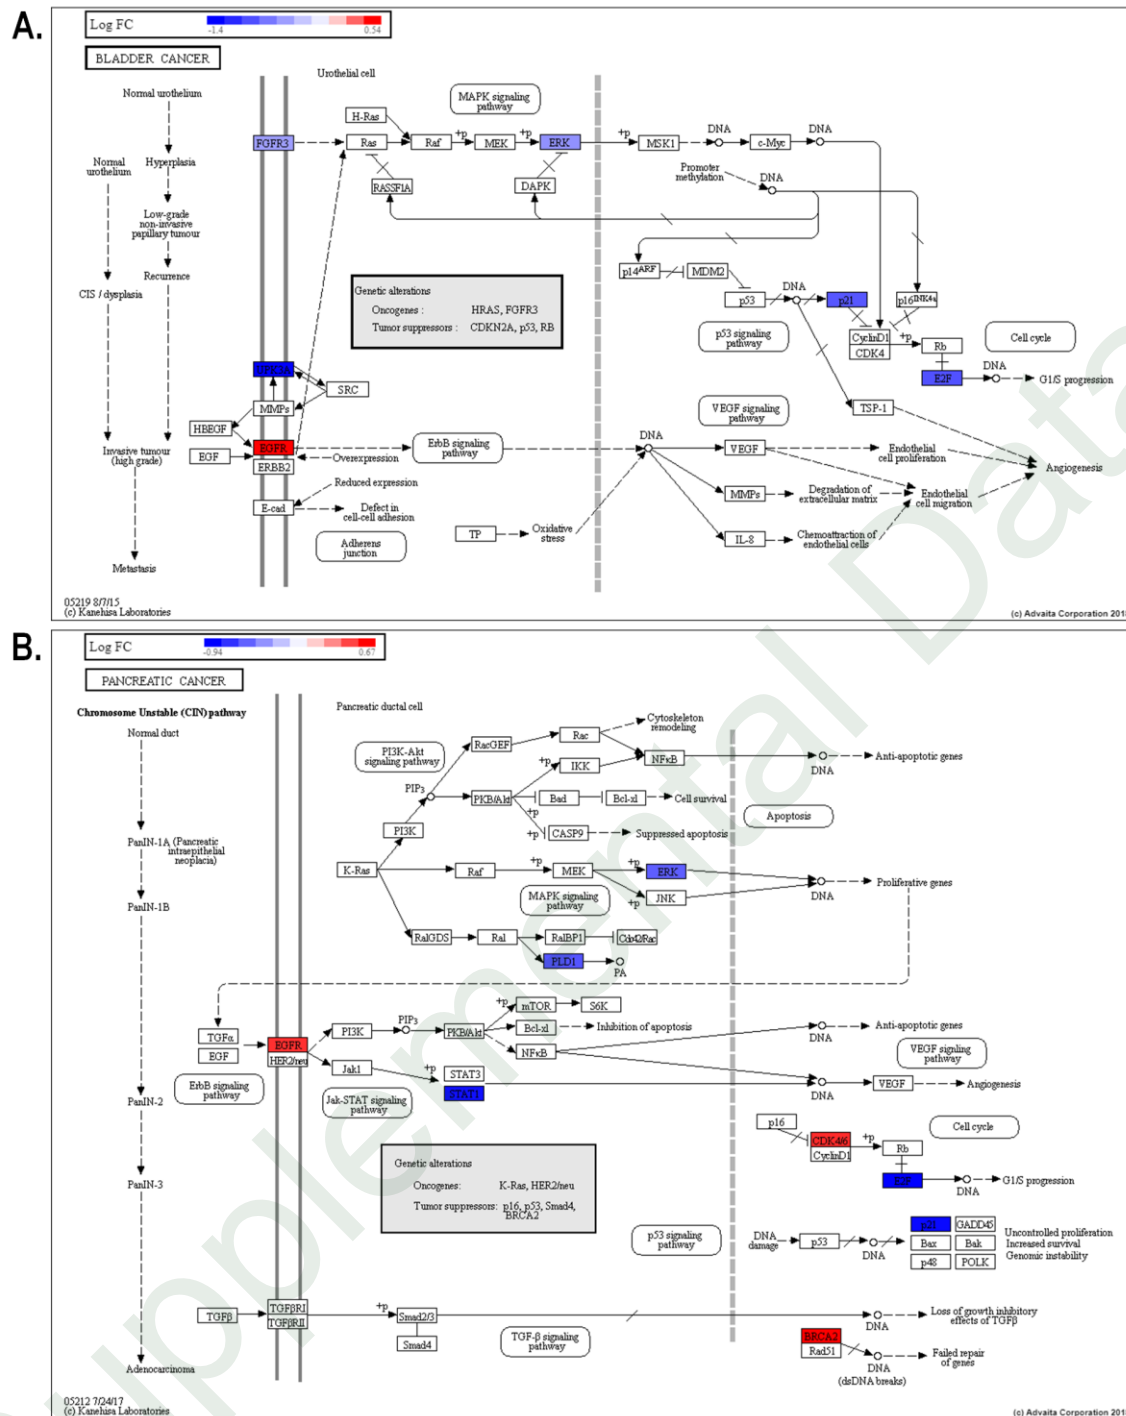

**Figure S4. Avicquinone B significantly impacts the expression of targets within cancer signaling pathways.** Differentially expressed genes (DEGs) between HT-29 cells treated with avicquinone B (8.20  $\mu\text{M}$ ) and vehicle (control) were analyzed using iPathwayGuide online software to identify that (A) Bladder Cancer, (B) Pancreatic Cancer, and (C) Breast Cancer were significantly impacted. The heat map at the top left shows the Log<sub>2</sub> fold change (LogFC), where blue indicates down-regulated genes and red indicates up-regulated genes. Only those genes that meet our criteria of differential expression ( $\text{Log}_2 |(\text{fold change})| \geq 0.5$ ,  $p\text{-value} \leq 0.001$ , and  $q\text{-value} \leq 0.05$ ).

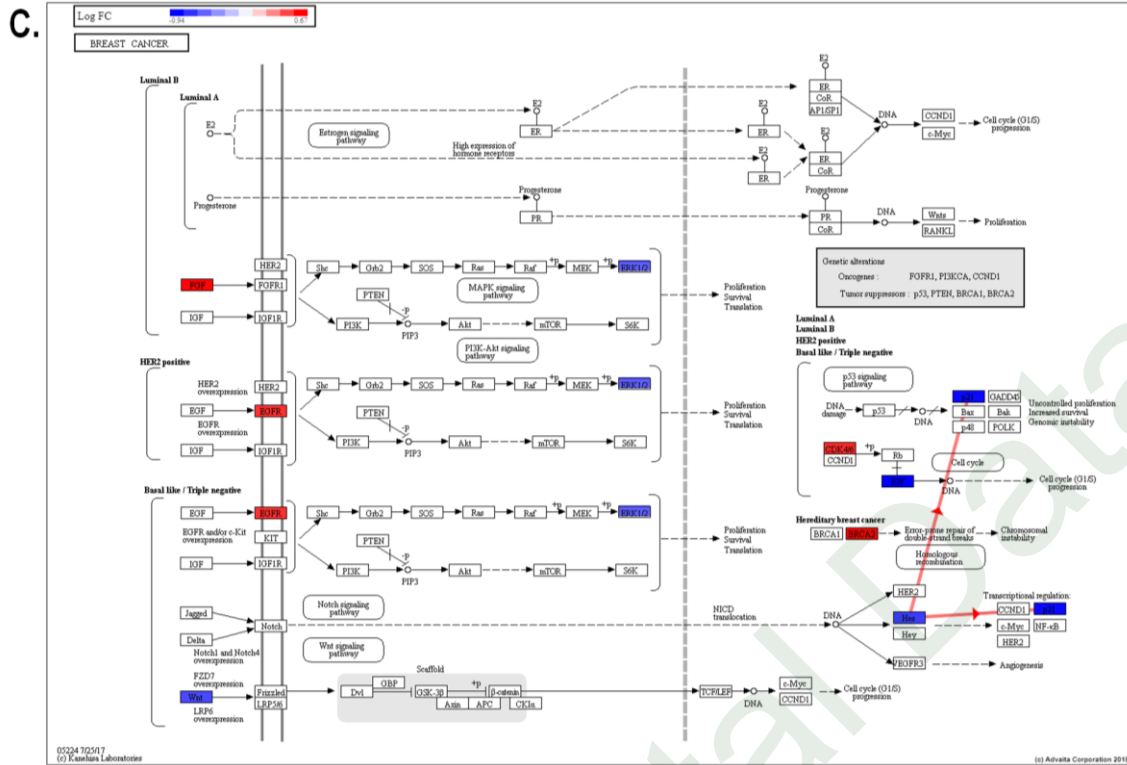

Figure S4. (Continuation)

A.

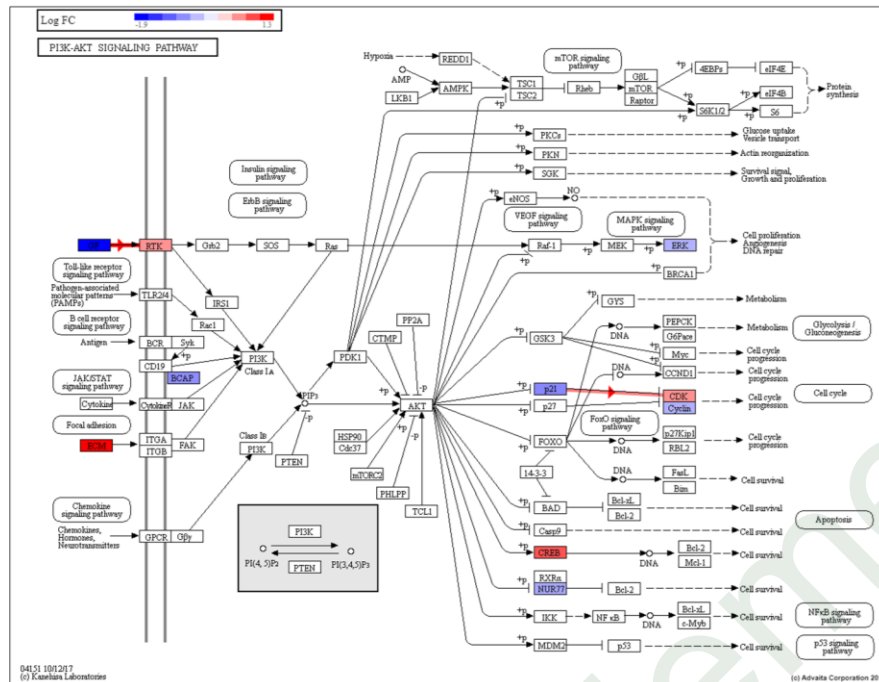

B.

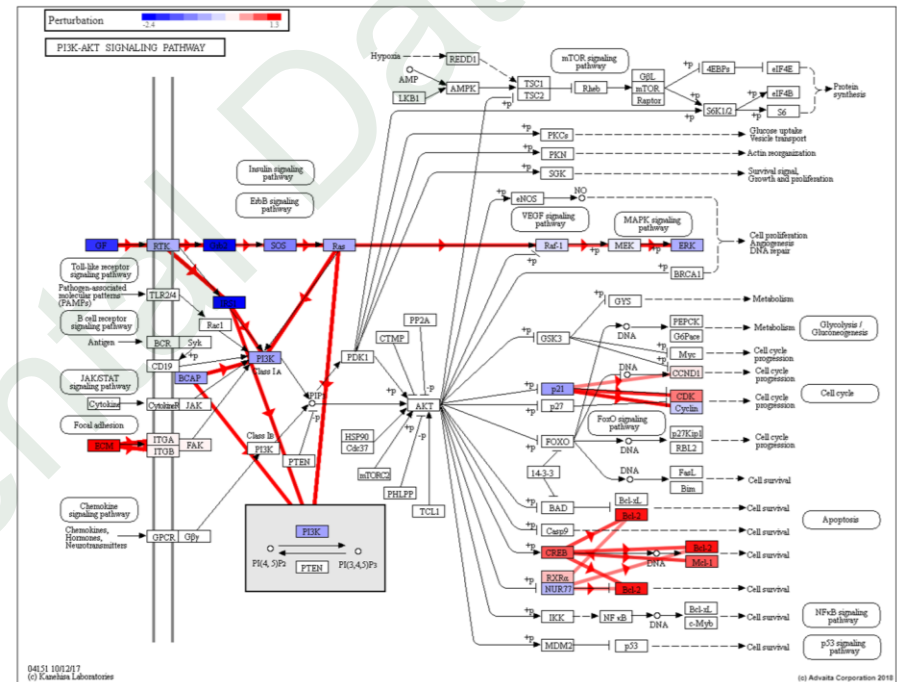

**Figure S5. Avicquinone B significantly impacts the expression of targets within PI3K-AKT signaling pathway.** Differentially expressed genes (DEGs) between HT-29 cells treated with compound avicquinone B (8.20  $\mu$ M) and vehicle (control) were analyzed using iPathwayGuide online software. **(A)** Impact Analysis. The heat map at the top left shows the Log<sub>2</sub> fold change (LogFC), where blue indicates down-regulated genes and red indicates up-regulated genes. Only those genes that meet our criteria of differential expression are shown (Log<sub>2</sub> |(fold change)|  $\geq 0.5$ ,  $p$ -value  $\leq 0.001$ , and  $q$ -value  $\leq 0.05$ ). **(B)** Perturbation analysis. The heat map at the top left shows the predicted perturbation (FC + accumulation), where blue indicates down-regulated genes and red indicates up-regulated genes, bold red highlighted arrows indicates coherent cascades.

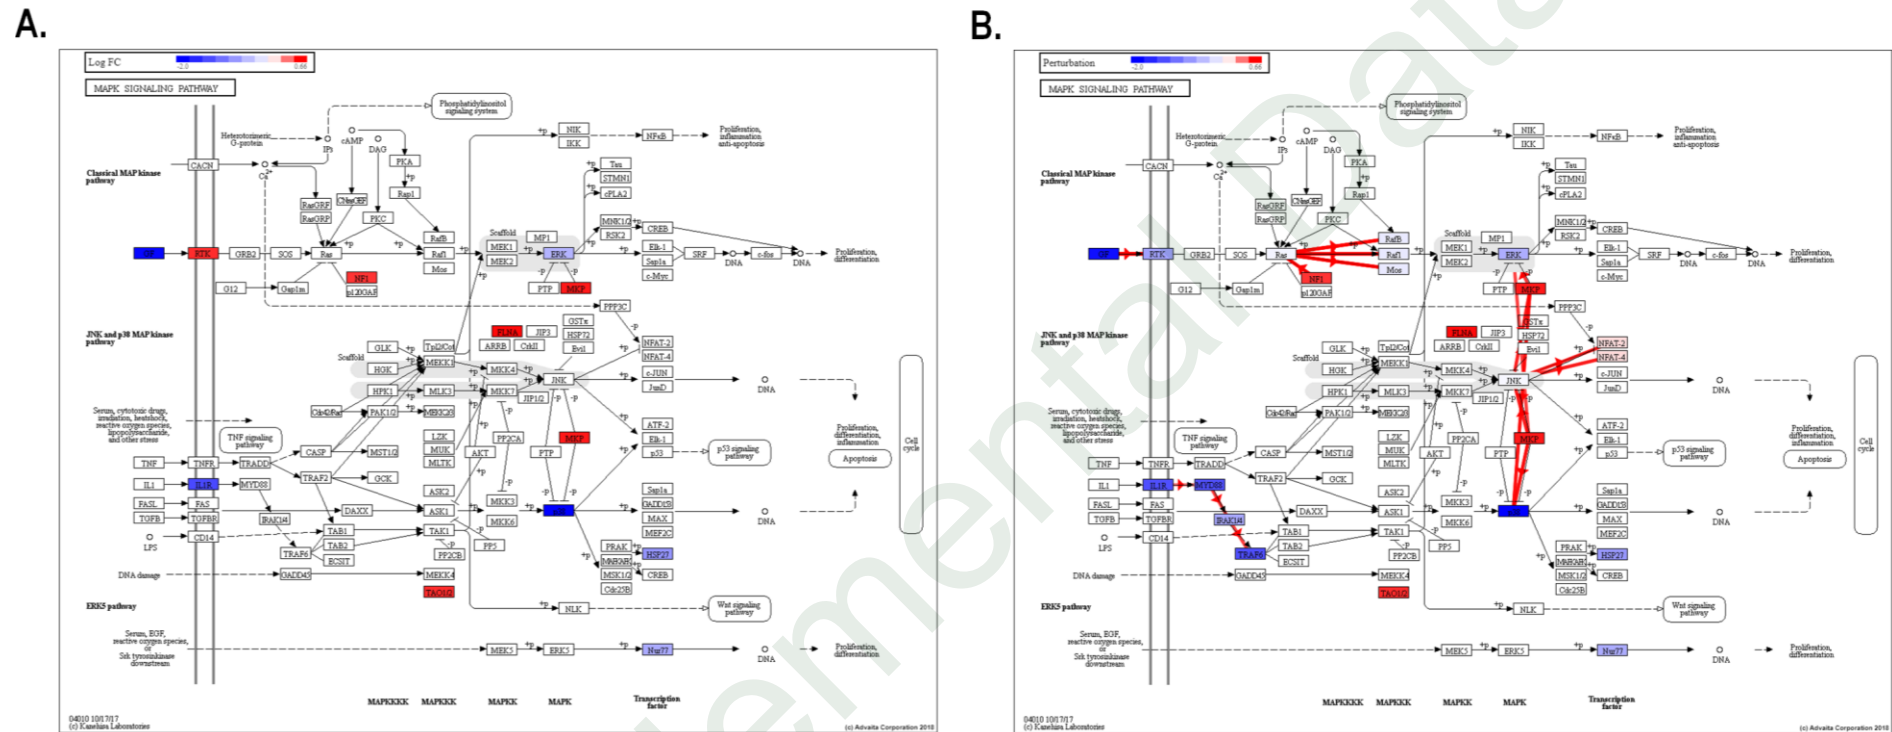

**Figure S6. Avicequinone B significantly impacts the expression of targets within MAPK signaling pathway.** Differentially expressed genes (DEGs) between HT-29 cells treated with compound avicequinone B (8.20  $\mu$ M) and vehicle (control) were analyzed using iPathwayGuide online software. **(A)** Impact Analysis. The heat map at the top left shows the Log<sub>2</sub> fold change (LogFC), where blue indicates down-regulated genes and red indicates up-regulated genes. Only those genes that meet our criteria of differential expression are shown (Log<sub>2</sub> |(fold change)|  $\geq 0.5$ ,  $p$ -value  $\leq 0.001$ , and  $q$ -value  $\leq 0.05$ ). **(B)** Perturbation analysis. The heat map at the top left shows the predicted perturbation (FC + accumulation), where blue indicates down-regulated genes and red indicates up-regulated genes, bold red highlighted arrows indicate coherent cascades.

## 1. References

1. Bolger AM, Lohse M, Usadel B. Trimmomatic: A flexible trimmer for illumina sequence data. *Bioinformatics* 2014;30(15):2114-20. doi: 10.1093/bioinformatics/btu170
2. Trapnell C, Pachter L, Salzberg SL. Tophat: Discovering splice junctions with rna-seq. *Bioinformatics* 2009;25(9):1105-11. doi: 10.1093/bioinformatics/btp120
3. Trapnell C, Roberts A, Goff L, Pertea G, Kim D, Kelley DR, et al. Differential gene and transcript expression analysis of rna-seq experiments with tophat and cufflinks. *Nature protocols* 2012;7(3):562-78. doi: 10.1038/nprot.2012.016
4. Szklarczyk D, Franceschini A, Wyder S, Forslund K, Heller D, Huerta-Cepas J, et al. String v10: Protein-protein interaction networks, integrated over the tree of life. *Nucleic acids research* 2015;43(Database issue):D447-52. doi: 10.1093/nar/gku1003
5. Shannon P, Markiel A, Ozier O, Baliga NS, Wang JT, Ramage D, et al. Cytoscape: A software environment for integrated models of biomolecular interaction networks. *Genome research* 2003;13(11):2498-504. doi: 10.1101/gr.1239303
6. Andreu P, Colnot S, Godard C, Laurent-Puig P, Lamarque D, Kahn A, et al. Identification of the *ifitm* family as a new molecular marker in human colorectal tumors. *Cancer Research* 2006;66(4):1949. doi: 10.1158/0008-5472.CAN-05-2731
7. He JD, Luo HL, Li J, Feng WT, Chen LB. Influences of the interferon induced transmembrane protein 1 on the proliferation, invasion, and metastasis of the colorectal cancer sw480 cell lines. *Chinese medical journal* 2012;125(3):517-22.
8. He J, Li J, Feng W, Chen L, Yang K. Prognostic significance of inf-induced transmembrane protein 1 in colorectal cancer. *International journal of clinical and experimental pathology* 2015;8(12):16007-13.
9. Yu F, Xie D, Ng SS, Lum CT, Cai M-Y, Cheung WK, et al. Ifitm1 promotes the metastasis of human colorectal cancer via cav-1. *Cancer Letters* 2015;368(1):135-43. doi: <https://doi.org/10.1016/j.canlet.2015.07.034>
10. Li X, Gill R, Cooper NG, Yoo JK, Datta S. Modeling microrna-mrna interactions using pls regression in human colon cancer. *BMC Medical Genomics* 2011;4(1):44. doi: 10.1186/1755-8794-4-44
11. Virag P, Fischer-Fodor E, Perde-Schrepler M, Brie I, Tatomir C, Balacescu L, et al. Oxaliplatin induces different cellular and molecular chemoresistance patterns in colorectal cancer cell lines of identical origins. *BMC Genomics* 2013;14(1):480. doi: 10.1186/1471-2164-14-480
12. Wagner S, Vlachogiannis G, De Haven Brandon A, Valenti M, Box G, Jenkins L, et al. Suppression of interferon gene expression overcomes resistance to mek inhibition in kras-mutant colorectal cancer. *Oncogene* 2018. doi: 10.1038/s41388-018-0554-z
13. Tang H, Guo Q, Zhang C, Zhu J, Yang H, Zou YL, et al. Identification of an intermediate signature that marks the initial phases of the colorectal adenoma-carcinoma transition. *International journal of molecular medicine* 2010;26(5):631-41. doi: [https://doi.org/10.3892/ijmm\\_00000508](https://doi.org/10.3892/ijmm_00000508)
14. Kim S-C, Hong C-W, Jang S-G, Kim Y-A, Yoo B-C, Shin Y-K, et al. Establishment and characterization of paired primary and peritoneal seeding human colorectal cancer cell lines: Identification of genes that mediate metastatic potential. *Translational Oncology* 2018;11(5):1232-43. doi: 10.1016/j.tranon.2018.07.014
15. Yu W, Lin Z, Pastor DM, Hegarty JP, Chen X, Kelly AA, et al. Genes regulated by nkx2-3 in sporadic and inflammatory bowel disease-associated colorectal cancer cell lines. *Digestive diseases and sciences* 2010;55(11):3171-80. doi: 10.1007/s10620-010-1138-0

16. Heckmann D, Maier P, Laufs S, Li L, Sleeman JP, Trunk MJ, et al. The disparate twins: A comparative study of *cxcr4* and *cxcr7* in *sdf-1 $\alpha$* -induced gene expression, invasion and chemosensitivity of colon cancer. *Clinical Cancer Research* 2014;20(3):604-16. doi: 10.1158/1078-0432.ccr-13-0582
17. Slattery ML, Pellatt AJ, Lee FY, Herrick JS, Samowitz WS, Stevens JR, et al. Infrequently expressed mirnas influence survival after diagnosis with colorectal cancer. *Oncotarget* 2017;8(48):83845-59. doi: 10.18632/oncotarget.19863
18. Dai W, Li Y, Mo S, Feng Y, Zhang L, Xu Y, et al. A robust gene signature for the prediction of early relapse in stage i-iii colon cancer. *Molecular oncology* 2018;12(4):463-75. doi: 10.1002/1878-0261.12175
19. Giarnieri E, Alderisio M, Valli C, Vecchione A, Forte A, Turano R, et al. Overexpression of *ndp* kinase *nm23* associated with ploidy image analysis in colorectal cancer. *Anticancer research* 1995;15(5B):2049-53.
20. Yamashita K, Katoh H, Watanabe M. The homeobox only protein homeobox (*hopx*) and colorectal cancer. *International journal of molecular sciences* 2013;14(12):23231-43. doi: 10.3390/ijms141223231
21. Oltedal S, Skaland I, Maple-Grødem J, Tjensvoll K, Janssen EAM, Gilje B, et al. Expression profiling and intracellular localization studies of the novel proline-, histidine-, and glycine-rich protein 1 suggest an essential role in gastro-intestinal epithelium and a potential clinical application in colorectal cancer diagnostics. *BMC Gastroenterology* 2018;18(1):26. doi: 10.1186/s12876-018-0752-8
22. He P, Li K, Li SB, Hu TT, Guan M, Sun FY, et al. Upregulation of *akap12* with *hdac3* depletion suppresses the progression and migration of colorectal cancer. *International journal of oncology* 2018;52(4):1305-16. doi: 10.3892/ijo.2018.4284
23. Liu W, Guan M, Su B, Ye C, Li J, Zhang X, et al. Quantitative assessment of *akap12* promoter methylation in colorectal cancer using methylation-sensitive high resolution melting: Correlation with duke's stage. *Cancer biology & therapy* 2010;9(11):862-71. doi: 10.4161/cbt.9.11.11633
24. Liu W, Guan M, Hu T, Gu X, Lu Y. Re-expression of *akap12* inhibits progression and metastasis potential of colorectal carcinoma *in vivo* and *in vitro*. *PloS one* 2011;6(8):e24015. doi: 10.1371/journal.pone.0024015
25. Luque-Garcia JL, Martinez-Torrecedrada JL, Epifano C, Canamero M, Babel I, Casal JI. Differential protein expression on the cell surface of colorectal cancer cells associated to tumor metastasis. *Proteomics* 2010;10(5):940-52. doi: 10.1002/pmic.200900441
26. Willis AJ, Indra R, Wohak LE, Sozeri O, Feser K, Mrizova I, et al. The impact of chemotherapeutic drugs on the *cypl1a1*-catalysed metabolism of the environmental carcinogen benzo[a]pyrene: Effects in human colorectal hct116 *tp53*(+/+), *tp53*(+/-) and *tp53*(-/-) cells. *Toxicology* 2018;398-399:1-12. doi: <https://doi.org/10.1016/j.tox.2018.02.006>
27. Pande M, Amos CI, Osterwisch DR, Chen J, Lynch PM, Broaddus R, et al. Genetic variation in genes for the xenobiotic-metabolizing enzymes *cypl1a1*, *ephx1*, *gstm1*, *gstt1*, and *gstp1* and susceptibility to colorectal cancer in lynch syndrome. *Cancer Epidemiology Biomarkers & Prevention* 2008;17(9):2393-401. doi: 10.1158/1055-9965.epi-08-0326
28. Zheng Y, Wang J-J, Sun L, Li H-L. Association between *cypl1a1* polymorphism and colorectal cancer risk: A meta-analysis. *Molecular Biology Reports* 2012;39(4):3533-40. doi: 10.1007/s11033-011-1126-2

29. Chou CK, Fan CC, Lin PS, Liao PY, Tung JC, Hsieh CH, et al. Sciellin mediates mesenchymal-to-epithelial transition in colorectal cancer hepatic metastasis. *Oncotarget* 2016;7(18):25742-54. doi: 10.18632/oncotarget.8264
30. Doleman JF, Eady JJ, Elliott RM, Foxall RJ, Seers J, Johnson IT, et al. Identification of the eph receptor pathway as a novel target for eicosapentaenoic acid (epa) modification of gene expression in human colon adenocarcinoma cells (ht-29). *Nutrition & Metabolism* 2010;7(1):56. doi: 10.1186/1743-7075-7-56
31. Lundemo AG, Pettersen CH, Berge K, Berge RK, Schönberg SA. Tetradecylthioacetic acid inhibits proliferation of human sw620 colon cancer cells - gene expression profiling implies endoplasmic reticulum stress. *Lipids in Health and Disease* 2011;10(1):190. doi: 10.1186/1476-511x-10-190
32. Toda K, Kawada K, Iwamoto M, Inamoto S, Sasazuki T, Shirasawa S, et al. Metabolic alterations caused by kras mutations in colorectal cancer contribute to cell adaptation to glutamine depletion by upregulation of asparagine synthetase. *Neoplasia* 2016;18(11):654-65. doi: 10.1016/j.neo.2016.09.004
33. Zhang Z, Li Z, Wu X, Zhang C-F, Calway T, He T-C, et al. Trail pathway is associated with inhibition of colon cancer by protopanaxadiol. *Journal of Pharmacological Sciences* 2015;127(1):83-91. doi: <https://doi.org/10.1016/j.jphs.2014.11.003>
34. Sheffer M, Simon AJ, Jacob-Hirsch J, Rechavi G, Domany E, Givol D, et al. Genome-wide analysis discloses reversal of the hypoxia-induced changes of gene expression in colon cancer cells by zinc supplementation. *Oncotarget* 2011;2(12):1191-202. doi: 10.18632/oncotarget.395
35. Lim SR, Gooi BH, Gam LH. Identification of low abundance proteins in colorectal cancer tissues. *Cancer biomarkers : section A of Disease markers* 2012;12(4):185-98. doi: 10.3233/CBM-130307
36. Dimberg J, Strom K, Lofgren S, Zar N, Hugander A, Matussek A. Expression of the serine protease inhibitor serpina3 in human colorectal adenocarcinomas. *Oncology letters* 2011;2(3):413-8. doi: 10.3892/ol.2011.280
37. Long NP, Lee WJ, Huy NT, Lee SJ, Park JH, Kwon SW. Novel biomarker candidates for colorectal cancer metastasis: A meta-analysis of *in vitro* studies. *Cancer informatics* 2016;15(Suppl 4):11-7. doi: 10.4137/CIN.S40301
38. Peltier J, Roperch J-P, Audebert S, Borg J-P, Camoin L. Quantitative proteomic analysis exploring progression of colorectal cancer: Modulation of the serpin family. *Journal of Proteomics* 2016;148:139-48. doi: <https://doi.org/10.1016/j.jprot.2016.07.031>
39. Murakami T, Kikuchi H, Ishimatsu H, Ino I, Hirotsu A, Matsumoto T, et al. Tenascin c in colorectal cancer stroma is a predictive marker for liver metastasis and is a potent target of mir-198 as identified by microRNA analysis. *British journal of cancer* 2017;117(9):1360-70. doi: 10.1038/bjc.2017.291
40. Li M, Peng F, Li G, Fu Y, Huang Y, Chen Z, et al. Proteomic analysis of stromal proteins in different stages of colorectal cancer establishes tenascin-c as a stromal biomarker for colorectal cancer metastasis. *Oncotarget* 2016;7(24):37226-37. doi: 10.18632/oncotarget.9362
